# Supplementary material for: The tridecaptins: non-ribosomal peptides that selectively target Gram-negative bacteria
Source: PubMed Central journal article supplement (PMC8127968; doi:10.1039/d0md00413h), 2021-01-22
Supplement: MD-012-D0MD00413H-s001.pdf [file MD-012-D0MD00413H-s001.pdf]

## Supplementary Information

FOR

# The Tridecaptins: Non-Ribosomal Peptides That Selectively Target Gram-Negative Bacteria

Samantha J. Bann,<sup>a</sup> Ross D. Ballantine<sup>a</sup> and Stephen A. Cochrane\*<sup>a</sup>

<sup>a</sup> School of Chemistry and Chemical Engineering, David Keir Building, Stranmillis Road, Queen's University Belfast, Belfast, UK, BT9 5AG

\*To whom correspondence should be addressed. Email: [s.cochrane@qub.ac.uk](mailto:s.cochrane@qub.ac.uk)

*Contains chemical structures of all natural and synthetic tridecaptin analogues reported to date, with MIC data and also toxicity and haemolytic data, where available.*

## TABLE OF CONTENTS

| Contents                                                                                                                                                                                                                                                                                                                                                       | Page Number |
|----------------------------------------------------------------------------------------------------------------------------------------------------------------------------------------------------------------------------------------------------------------------------------------------------------------------------------------------------------------|-------------|
| Analogues <b>1 – 4</b> :<br>J. Shoji <i>et al.</i> , <i>J. Antibiot.</i> <b>1978</b> , 31 (7), 646–651.<br>T. Kato <i>et al.</i> , <i>J. Antibiot.</i> <b>1978</b> , 31, 652–661.<br>J. Shoji <i>et al.</i> , <i>J. Antibiot.</i> <b>1979</b> , 32 (4), 313–319.<br>C. T. Lohans <i>et al.</i> , <i>J. Am. Chem. Soc.</i> <b>2012</b> , 134 (48), 19540–19543. | S1, S3      |
| Analogues <b>5 – 8</b> :<br>J. Shoji <i>et al.</i> , <i>J. Antibiot.</i> <b>1978</b> , 31 (7), 646–651.<br>T. Kato <i>et al.</i> , <i>J. Antibiot.</i> <b>1979</b> , 32 (4), 305–312.<br>J. Shoji <i>et al.</i> , <i>J. Antibiot.</i> <b>1979</b> , 32 (4), 313–319.                                                                                           | S2, S3      |
| Analogues <b>9 – 11</b> :<br>J. Shoji <i>et al.</i> , <i>J. Antibiot.</i> <b>1978</b> , 31 (7), 646–651.<br>T. Kato <i>et al.</i> , <i>J. Antibiot.</i> <b>1979</b> , 32 (4), 305–312.<br>J. Shoji <i>et al.</i> , <i>J. Antibiot.</i> <b>1979</b> , 32 (4), 313–319.                                                                                          | S2, S3      |
| Analogues <b>1, 12 – 32</b> : S. A. Cochrane <i>et al.</i> , <i>J. Med. Chem.</i> <b>2014</b> , 57, 1127–1131.                                                                                                                                                                                                                                                 | S4          |
| Analogues <b>33 – 40</b> : S. A. Cochrane <i>et al.</i> , <i>J. Med. Chem.</i> <b>2015</b> , 58 (24), 9779–9785.                                                                                                                                                                                                                                               | S9          |
| Analogues <b>41 – 53</b> : S. A. Cochrane <i>et al.</i> , <i>ChemBioChem</i> <b>2014</b> , 15 (9), 1295–1299.                                                                                                                                                                                                                                                  | S13         |
| Analogues <b>54 – 61</b> : R. D. Ballantine <i>et al.</i> , <i>Chem. Commun.</i> <b>2018</b> , 54, 10634–10637.                                                                                                                                                                                                                                                | S16         |
| Analogues <b>62 – 68</b> : R. D. Ballantine <i>et al.</i> , <i>MedChemComm</i> <b>2019</b> , 10, 484–487.                                                                                                                                                                                                                                                      | S18         |
| Analogues <b>69 – 84</b> : S. J. Bann <i>et al.</i> , <i>J. Med. Chem.</i> <b>2019</b> , 62, 10466–10472.                                                                                                                                                                                                                                                      | S21         |
| Analogue <b>85</b> : W. Wang <i>et al.</i> , <i>Anal. Bioanal. Chem.</i> <b>2019</b> , 411, 4017–4023.                                                                                                                                                                                                                                                         | S25         |
| Analogues <b>86 – 91</b> : S. A. Cochrane <i>et al.</i> , <i>Org. Biomol. Chem.</i> <b>2015</b> , 13 (21), 6073–6081.                                                                                                                                                                                                                                          | S26         |
| Analogue <b>92</b> : M. Jangra <i>et al.</i> , <i>Antimicrob. Agents Chemother.</i> <b>2019</b> , 63 (6), e00338-19.                                                                                                                                                                                                                                           | S28         |
| Analogues <b>93 – 98</b> : M Jangra <i>et al.</i> , <i>Sci. Rep.</i> <b>2019</b> , 9 (18870),<br><a href="https://doi.org/10.1038/s41598-019-54716-8">doi.org/10.1038/s41598-019-54716-8</a> .                                                                                                                                                                 | S30         |

### Isolation of Tridecaptins A, B and C

J. Shoji, H. Hinoo, R. Sakazaki, T. Kato, Y. Wakisaka, M. Mayama, S. M. and H. M.  
*J. Antibiot.* **1978**, 31 (7), 646-651.

### The Structure of Tridecaptin A (Studies on Antibiotics From the Genus Bacillus. XXIV)

Kato, T., Hinoo, H., Shoji, J. *J. Antibiot.* **1978**, 31, 652-661.

### The Structures of Tridecaptins B and C

Kato, T.; Sakazaki, R.; Hinoo, H.; Shoji, J. *J. Antibiot.* **1979**, 32 (4), 305-312.

### Resolution of Peptide Antibiotics, Cerexins and Tridecaptins, By High Performance Liquid Chromatography (Studies on Antibiotics From the Genus Bacillus. XXVI)

Shoji, J.; Kato, T.; Terabe, S.; Konaka, R. *J. Antibiot.* **1979**, 32 (4), 313-319.

### Structural Characterization of the Highly Cyclized Lantibiotic Paenicidin A via a Partial Desulfurization/Reduction Strategy

Lohans, C. T.; Huang, Z.; Van Belkum, M. J.; Giroud, M.; Sit, C. S.; Steels, E. M.; Zheng, J.; Whittall, R. M.; McMullen, L. M.; Vederas, J. C. *J. Am. Chem. Soc.* **2012**, 134 (48), 19540-19543.

Tridecaptin A analogues were isolated as mixtures of fatty acid variants.

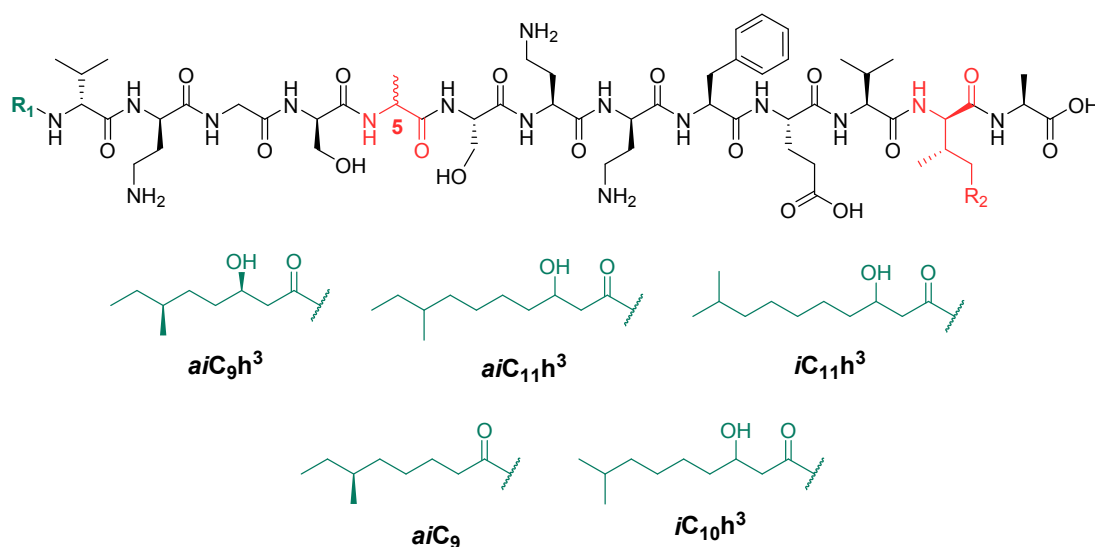

- 1a.** TriA<sub>α(1)</sub>: R<sub>1</sub> = aiC<sub>9</sub>h<sup>3</sup>, R<sub>2</sub> = Me, 5 = D-Trp      **2.** TriA<sub>β(2)</sub>: R<sub>1</sub> = aiC<sub>9</sub>h<sup>3</sup>, R<sub>2</sub> = H, 5 = D-Trp  
**1b.** TriA<sub>α(1)</sub>: R<sub>1</sub> = aiC<sub>11</sub>h<sup>3</sup>, R<sub>2</sub> = Me, 5 = D-Trp  
**1c.** TriA<sub>α(1)</sub>: R<sub>1</sub> = iC<sub>11</sub>h<sup>3</sup>, R<sub>2</sub> = Me, 5 = D-Trp  
**3a.** TriA<sub>3</sub>: R<sub>1</sub> = aiC<sub>11</sub>h<sup>3</sup>, R<sub>2</sub> = Me, 5 = D-Trp      **4a.** TriA<sub>4</sub>: R<sub>1</sub> = aiC<sub>11</sub>h<sup>3</sup>, R<sub>2</sub> = Me, 5 = D-Phe  
**3b.** TriA<sub>3</sub>: R<sub>1</sub> = iC<sub>11</sub>h<sup>3</sup>, R<sub>2</sub> = Me, 5 = D-Trp      **4b.** TriA<sub>4</sub>: R<sub>1</sub> = iC<sub>11</sub>h<sup>3</sup>, R<sub>2</sub> = Me, 5 = D-Phe

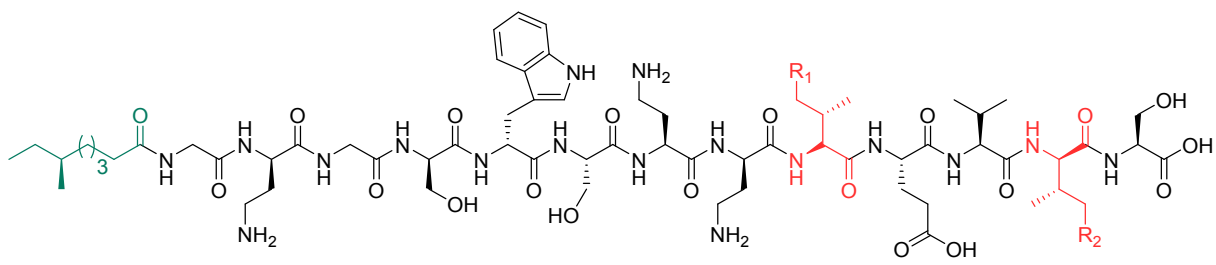

**5. TriB<sub>α</sub>**  
R<sub>1</sub>: Me, R<sub>2</sub>: Me

**6. TriB<sub>β</sub>**  
R<sub>1</sub>: Me, R<sub>2</sub>: H

**7. TriB<sub>γ</sub>**  
R<sub>1</sub>: H, R<sub>2</sub>: Me

**8. TriB<sub>δ</sub>**  
R<sub>1</sub>: H, R<sub>2</sub>: H

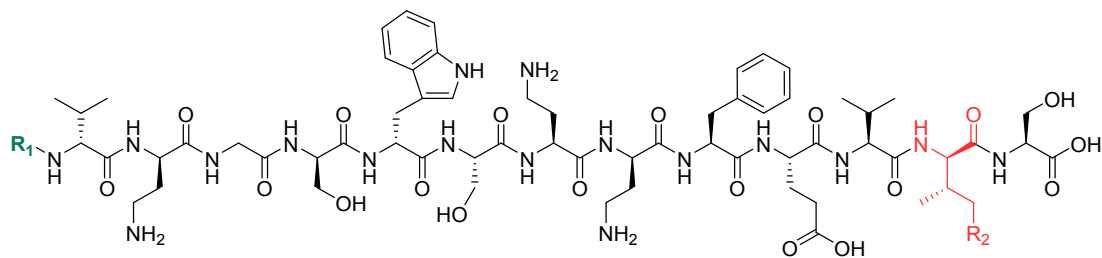

**9. TriC<sub>α1</sub>**: R<sub>1</sub> = *ai*C<sub>11</sub>h<sup>3</sup>, R<sub>2</sub> = H

**10. TriC<sub>α2</sub>**: R<sub>1</sub> = *i*C<sub>10</sub>h<sup>3</sup>, R<sub>2</sub> = H

**11. TriC<sub>β1</sub>**: R<sub>1</sub> = *ai*C<sub>11</sub>h<sup>3</sup>, R<sub>2</sub> = Me

**Table S1.** MIC values of TriA, B and C analogues against various bacterial strains.

*J. Shoji, H. Hino, R. Sakazaki, T. Kato, Y. Wakisaka, M. Mayama, S. M. and H. M. J. Antibiot. 1978, 31 (7), 646–651.*

| Bacterial strain and associated MIC ( $\mu\text{g}/\text{mL}$ ) | Analogue |      |      |
|-----------------------------------------------------------------|----------|------|------|
|                                                                 | A        | B    | C    |
| <b><i>Bacillus subtilis</i> PCI 219</b>                         | 12.5     | 12.5 | 6.25 |
| <b><i>Staphylococcus aureus</i> FDA 209P JC-1</b>               | 50       | 25   | 12.5 |
| <b><i>S. aureus</i> Smith</b>                                   | 50       | 25   | 12.5 |
| <b><i>S. aureus</i> 80257</b>                                   | 50       | 25   | 12.5 |
| <b><i>Streptococcus pyogenes</i> C-203</b>                      | 50       | 25   | 12.5 |
| <b><i>Diplococcus pneumoniae</i></b>                            | >50      | 50   | 25   |
| <b><i>Escherichia coli</i> NIHJ JC-2</b>                        | 6.25     | 12.5 | 6.25 |
| <b><i>E. coli</i> EC-14</b>                                     | 3.13     | 6.25 | 6.25 |
| <b><i>E. coli</i> 80750</b>                                     | 6.25     | 6.25 | 3.13 |
| <b><i>Klebsiella pneumoniae</i></b>                             | 6.25     | 12.5 | 6.25 |
| <b><i>Salmonella typhimurium</i></b>                            | 6.25     | 12.5 | 6.25 |
| <b><i>Pseudomonas aeruginosa</i> Ps-24</b>                      | 50       | 50   | 25   |
| <b><i>Proteus vulgaris</i> CN-329</b>                           | 50       | >50  | >50  |
| <b><i>Proteus mirabilis</i> PR-4</b>                            | >50      | >50  | >50  |

# Synthesis and Structure-Activity Relationship Studies of N-Terminal Analogues of the Antimicrobial Peptide Tridecaptin A<sub>1</sub>

Cochrane, S. A.; Lohans, C. T.; Brandelli, J. R.; Mulvey, G.; Armstrong, G. D.; Vederas, J. C. *J. Med. Chem.* **2014**, *57*, 1127-1131.

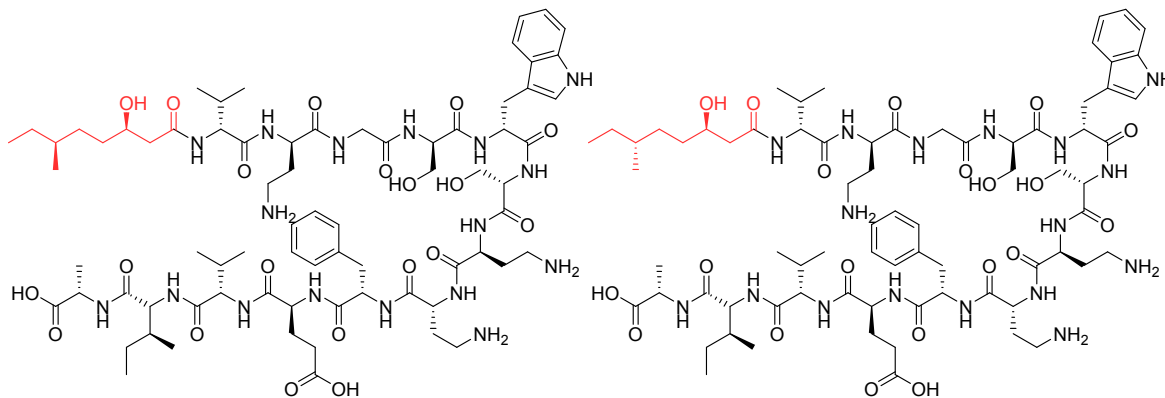

1. Natural TriA<sub>1</sub>

12. (3R,6R)-TriA<sub>1</sub>

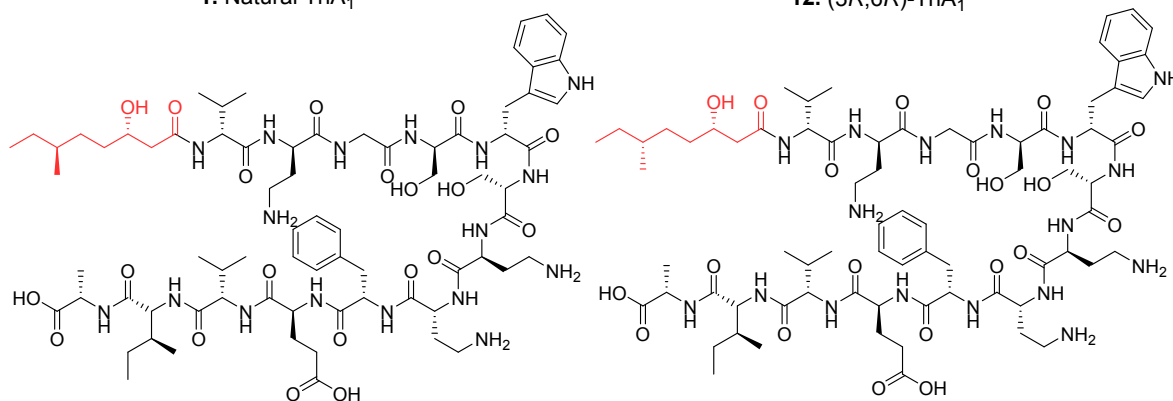

13. (3S,6S)-TriA<sub>1</sub>

14. (3S,6R)-TriA<sub>1</sub>

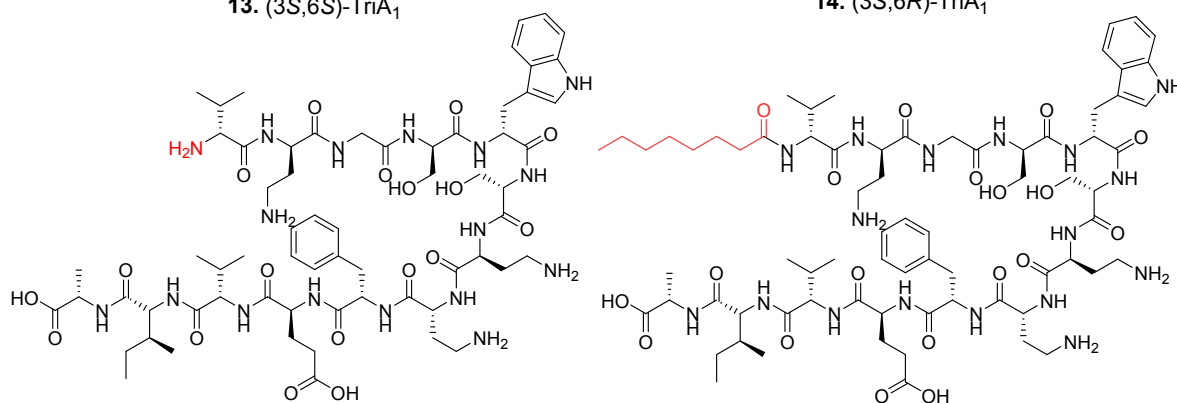

15. H-TriA<sub>1</sub>

16. Oct-TriA<sub>1</sub>

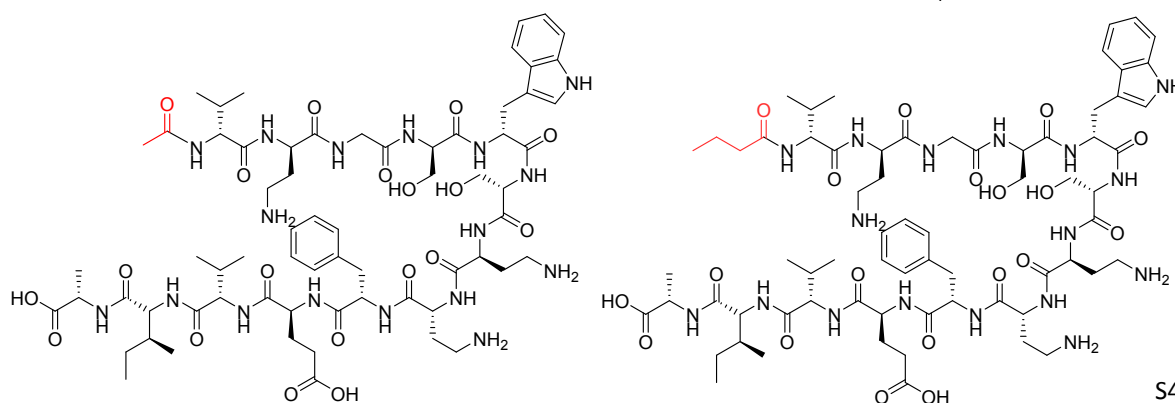

17. C2-TriA<sub>1</sub>

18. C4-TriA<sub>1</sub>

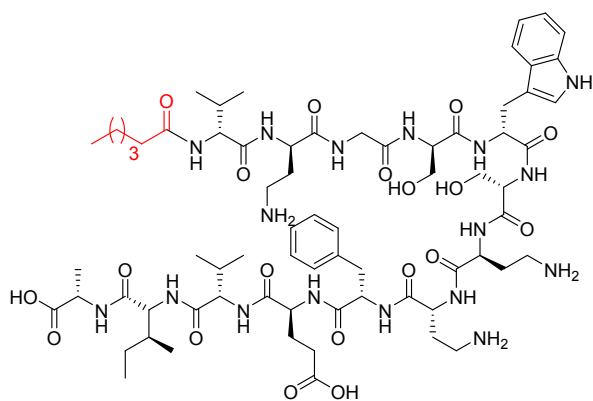

19. C6-TriA<sub>1</sub>

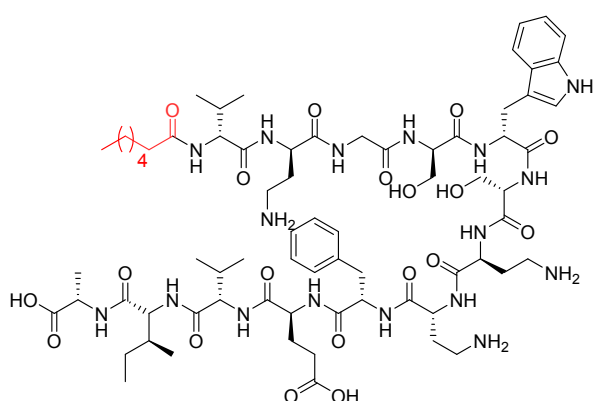

20. C7-TriA<sub>1</sub>

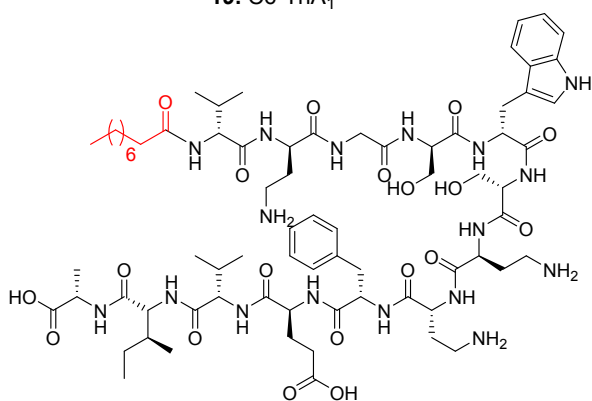

21. C9-TriA<sub>1</sub>

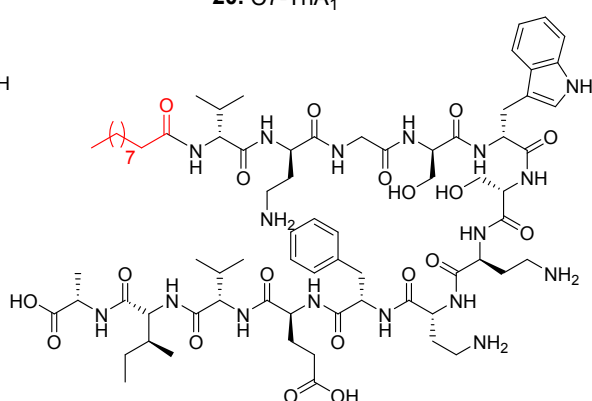

22. C10-TriA<sub>1</sub>

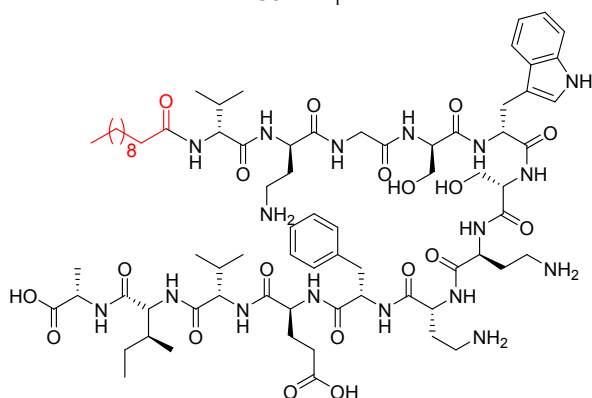

23. C11-TriA<sub>1</sub>

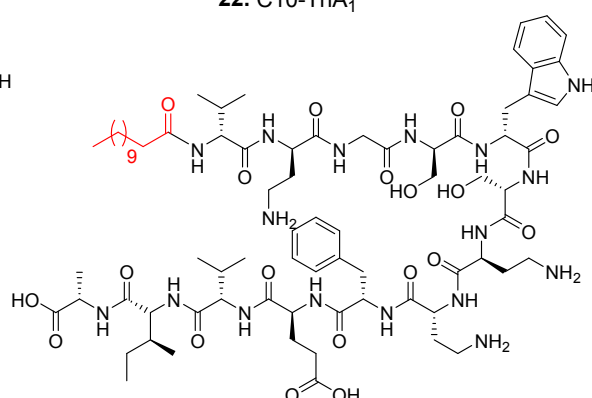

24. C12-TriA<sub>1</sub>

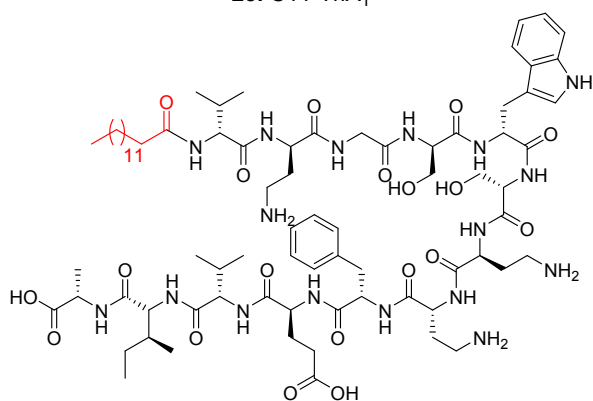

25. C14-TriA<sub>1</sub>

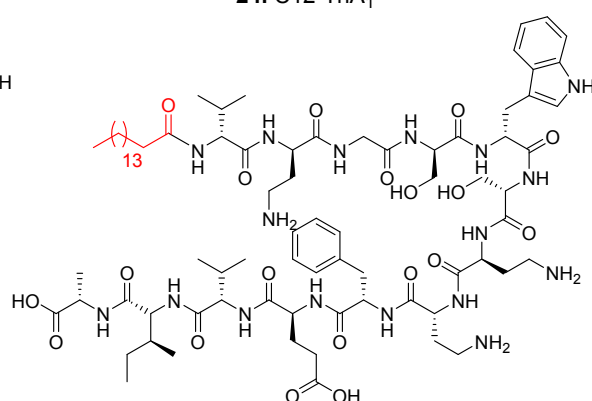

26. C16-TriA<sub>1</sub>

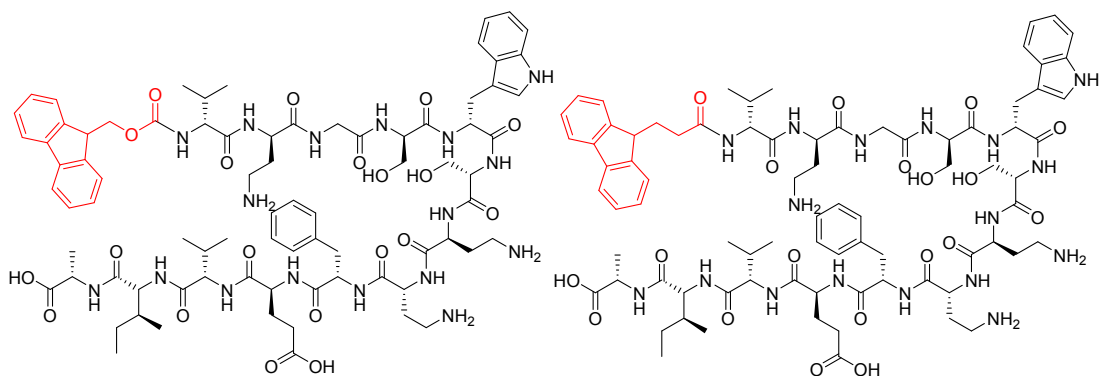

27. Fmoc-TriA<sub>1</sub>

28. Fpa-TriA<sub>1</sub>

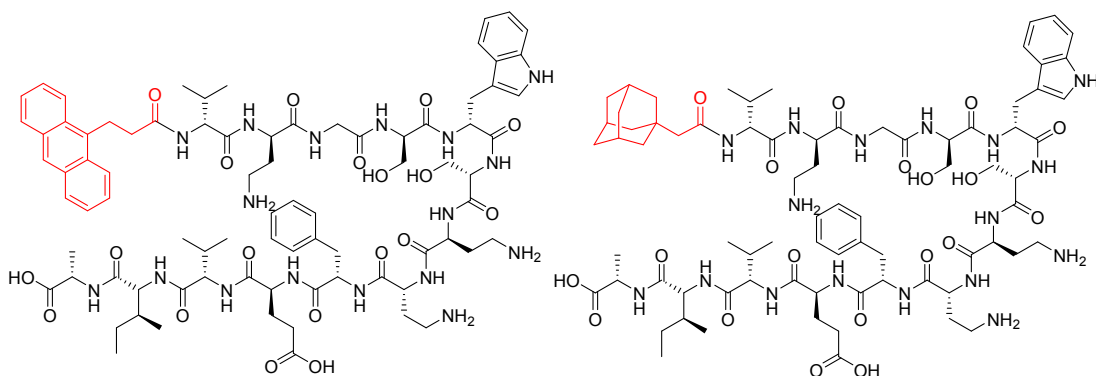

29. Apa-TriA<sub>1</sub>

30. Aaa-TriA<sub>1</sub>

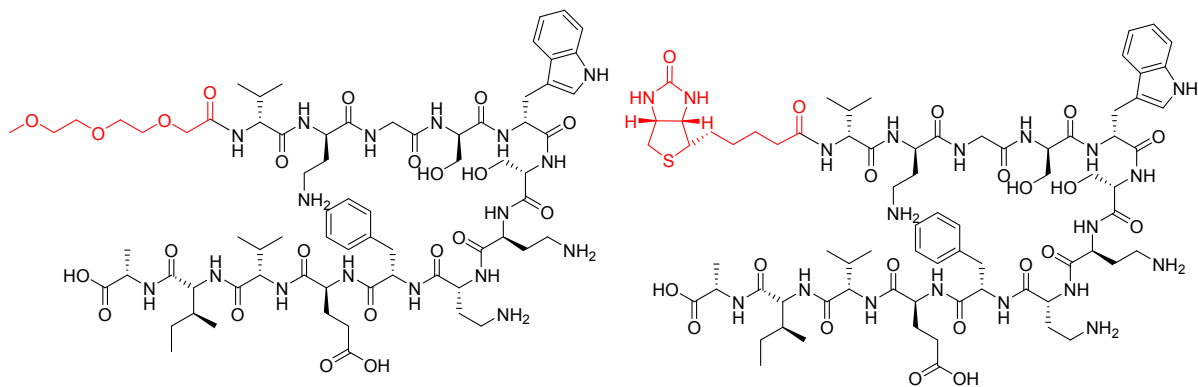

31. PEG-TriA<sub>1</sub>

32. Bio-TriA<sub>1</sub>

Cochrane, S. A.; Lohans, C. T.; Brandelli, J. R.; Mulvey, G.; Armstrong, G. D.; Vederas, J. C. *J. Med. Chem.* **2014**, *57*, 1127–1131.

| Analogue | MIC ( $\mu\text{g/mL}$ )           |                                       |                                          |                                        |                                         |                                           |                                         |                                         |                                          |                                        |
|----------|------------------------------------|---------------------------------------|------------------------------------------|----------------------------------------|-----------------------------------------|-------------------------------------------|-----------------------------------------|-----------------------------------------|------------------------------------------|----------------------------------------|
|          | <i>Escherichia coli</i> ATCC 25922 | <i>Salmonella enterica</i> ATCC 13311 | <i>Pseudomonas aeruginosa</i> ATCC 27853 | <i>Campylobacter jejuni</i> NCTC 11168 | <i>Klebsiella pneumoniae</i> ATCC 13883 | <i>Acinetobacter baumannii</i> ATCC 19606 | <i>Enterococcus faecalis</i> ATCC 29212 | <i>Staphylococcus aureus</i> ATCC 29213 | <i>Listeria monocytogenes</i> ATCC 19434 | <i>Enterococcus faecium</i> ATCC 19434 |
| 1        | 3.13                               | 6.25                                  | 50                                       | 1.56                                   | 3.13                                    | 12.5                                      | >100                                    | >100                                    | 50                                       | >100                                   |
| 12       | 3.13                               | 6.25                                  | 50                                       | 3.13                                   | 6.25                                    | 12.5                                      | >100                                    | >100                                    | 100                                      | >100                                   |
| 13       | 6.25                               | 6.25                                  | 50                                       | 1.56                                   | 6.25                                    | 25                                        | >100                                    | >100                                    | 100                                      | >100                                   |
| 14       | 12.5                               | 25                                    | 100                                      | 3.13                                   | 12.5                                    | 50                                        | >100                                    | >100                                    | >100                                     | >100                                   |
| 15       | 100                                | 100                                   | 100                                      | >100                                   | 50                                      | >100                                      | >100                                    | >100                                    | >100                                     | >100                                   |
| 16       | 3.13                               | 6.25                                  | 25                                       | 0.78                                   | 3.13                                    | 12.5                                      | 100                                     | 100                                     | 25                                       | 50                                     |
| 17       | 50                                 | 100                                   | >100                                     | 100                                    | 50                                      | >100                                      | >100                                    | >100                                    | >100                                     | >100                                   |
| 18       | 12.5                               | 25                                    | >100                                     | 12.5                                   | 25                                      | 100                                       | >100                                    | >100                                    | >100                                     | >100                                   |
| 19       | 3.13                               | 6.25                                  | 50                                       | 3.13                                   | 3.13                                    | 25                                        | >100                                    | >100                                    | 100                                      | >100                                   |
| 20       | 6.25                               | 12.5                                  | 50                                       | 1.56                                   | 6.25                                    | 12.5                                      | >100                                    | >100                                    | 50                                       | >100                                   |
| 21       | 12.5                               | 6.25                                  | 100                                      | 0.78                                   | 12.5                                    | 50                                        | 100                                     | 100                                     | 25                                       | 100                                    |
| 22       | 6.25                               | 12.5                                  | >100                                     | 0.4                                    | 6.25                                    | 12.5                                      | >100                                    | >100                                    | 25                                       | 100                                    |
| 23       | 6.25                               | 12.5                                  | >100                                     | 0.4                                    | 6.25                                    | 12.5                                      | >100                                    | >100                                    | 25                                       | 100                                    |
| 24       | 12.5                               | 50                                    | >100                                     | 0.4                                    | 12.5                                    | 50                                        | >100                                    | >100                                    | 50                                       | 100                                    |
| 25       | >100                               | >100                                  | >100                                     | 12.5                                   | >100                                    | >100                                      | >100                                    | >100                                    | >100                                     | >100                                   |
| 26       | >100                               | >100                                  | >100                                     | 50                                     | >100                                    | >100                                      | >100                                    | >100                                    | >100                                     | >100                                   |
| 27       | 6.25                               | 6.25                                  | >100                                     | 0.78                                   | 6.25                                    | 12.5                                      | 50                                      | 100                                     | 12.5                                     | 25                                     |
| 28       | 6.25                               | >100                                  | >100                                     | 1.56                                   | 100                                     | >100                                      | >100                                    | >100                                    | 100                                      | >100                                   |
| 29       | 6.25                               | 12.5                                  | >100                                     | 1.56                                   | 12.5                                    | 25                                        | >100                                    | >100                                    | 50                                       | >100                                   |
| 30       | 6.25                               | 6.25                                  | 50                                       | 1.56                                   | 12.5                                    | 12.5                                      | 50                                      | 50                                      | 25                                       | 50                                     |
| 31       | >100                               | >100                                  | >100                                     | >100                                   | >100                                    | >100                                      | >100                                    | >100                                    | >100                                     | >100                                   |
| 32       | 50                                 | 50                                    | >100                                     | 50                                     | 50                                      | >100                                      | >100                                    | >100                                    | >100                                     | >100                                   |



**Table S2.** MIC values of N-Terminal TriA<sub>1</sub> analogues against various bacterial strains.

**Table S3.** Toxicity data for N-Terminal TriA<sub>1</sub> analogues.

*Cochrane, S. A.; Lohans, C. T.; Brandelli, J. R.; Mulvey, G.; Armstrong, G. D.; Vederas, J. C. J. Med. Chem. 2014, 57, 1127–1131.*

| <b>Analogue<sup>a</sup></b> | <b>% haemolysis<sup>b</sup></b> | <b>IC<sub>50</sub> (µg/mL)<sup>c</sup></b> |
|-----------------------------|---------------------------------|--------------------------------------------|
| <b>1</b>                    | 3.2                             | 200                                        |
| <b>15</b>                   | 0.5                             |                                            |
| <b>16</b>                   | 4.7                             | 100                                        |
| <b>18</b>                   | 0.8                             |                                            |
| <b>24</b>                   | 82.2                            |                                            |
| <b>27</b>                   | 100                             |                                            |

<sup>a</sup> All peptides were tested at 83 µg/mL. <sup>b</sup> Haemolytic assays were run in triplicate. Absorbance of each sample was measured at 415 nm and percent haemolysis due to the corresponding peptide was calculated relative to Triton X-100 (taken as 100%).

<sup>c</sup> Cytotoxicity was determined against HEK 293 cell line with the respective absorbance of each cell measured at 570 nm.

**Synthesis of Tridecaptin-Antibiotic Conjugates with in Vivo Activity against Gram-Negative Bacteria**  
Cochrane, S. A.; Li, X.; He, S.; Yu, M.; Wu, M.; Vederas, J. C. *J. Med. Chem.* **2015**, *58* (24), 9779-9785.

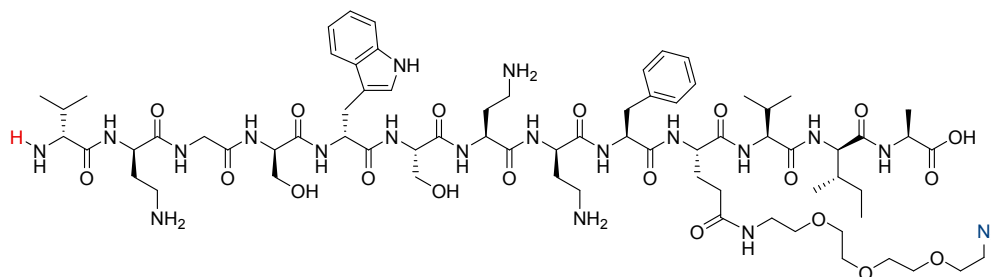

**33.** H-TriA<sub>1</sub>(Glu10-PEG<sub>3</sub>N<sub>3</sub>)

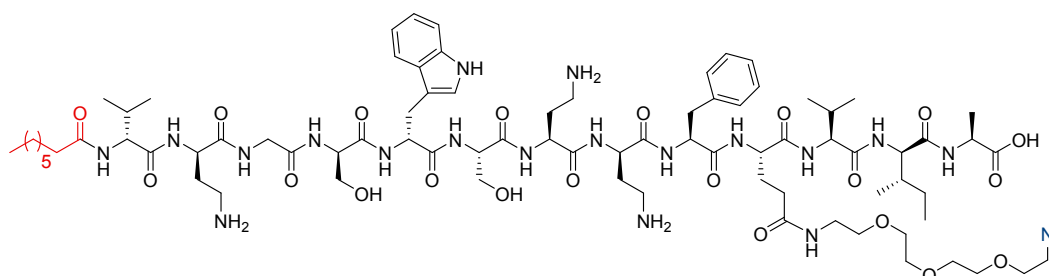

**34.** Oct-TriA<sub>1</sub>(Glu10-PEG<sub>3</sub>N<sub>3</sub>)

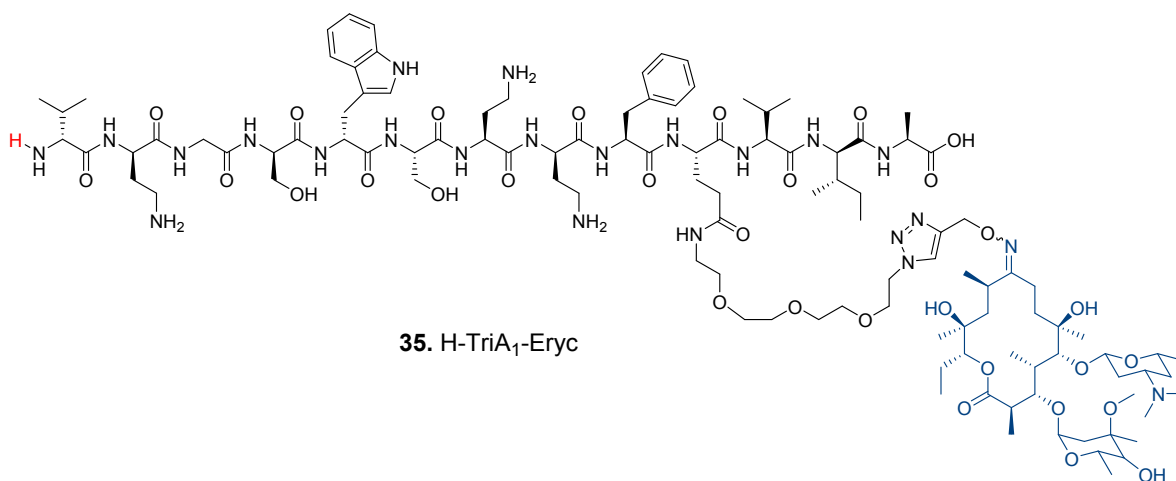

**35.** H-TriA<sub>1</sub>-Eryc

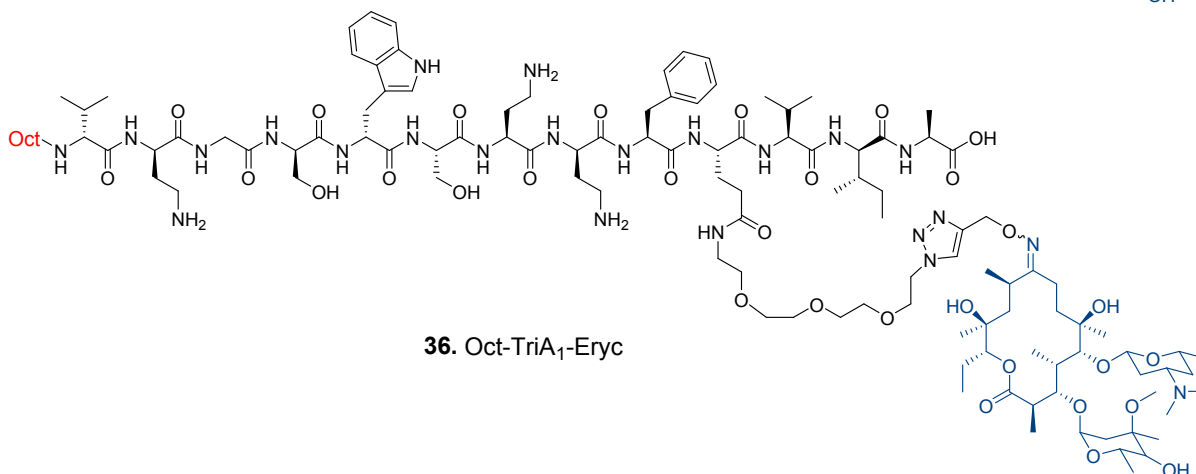

**36.** Oct-TriA<sub>1</sub>-Eryc

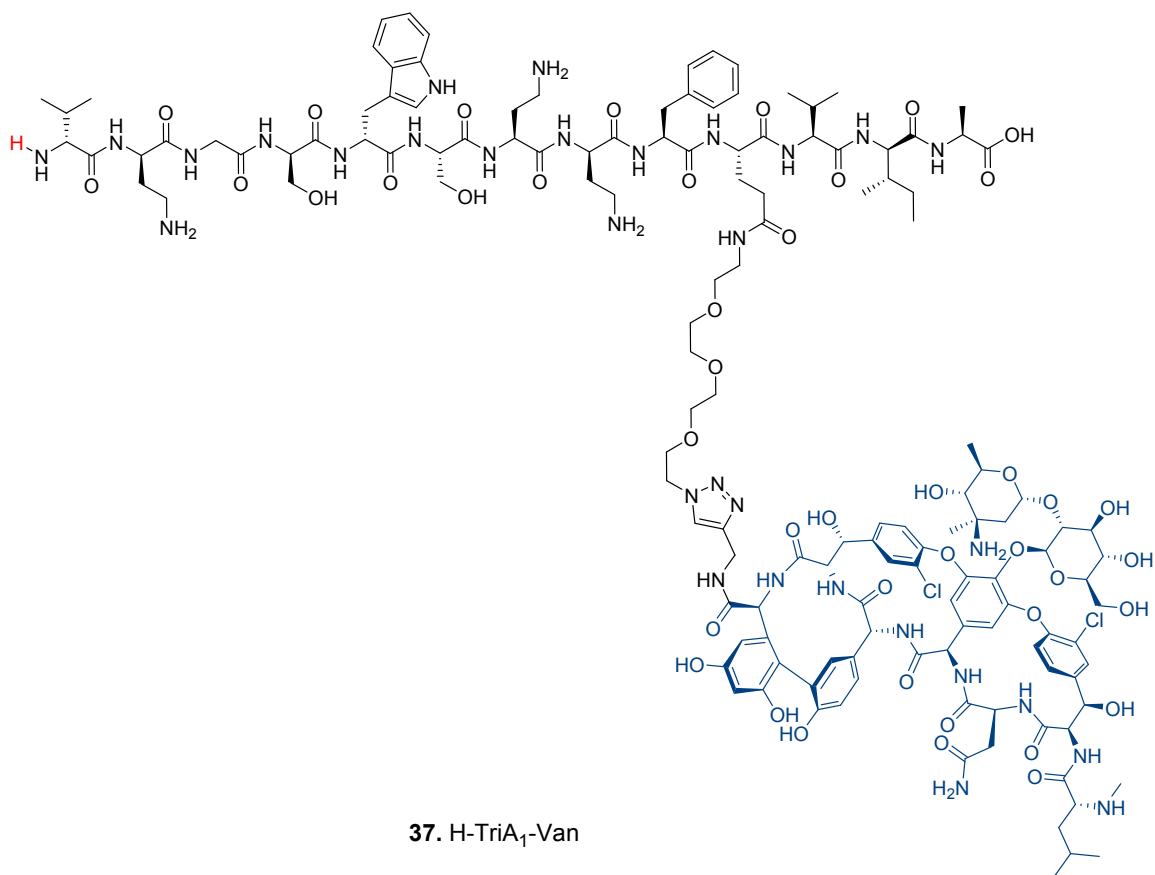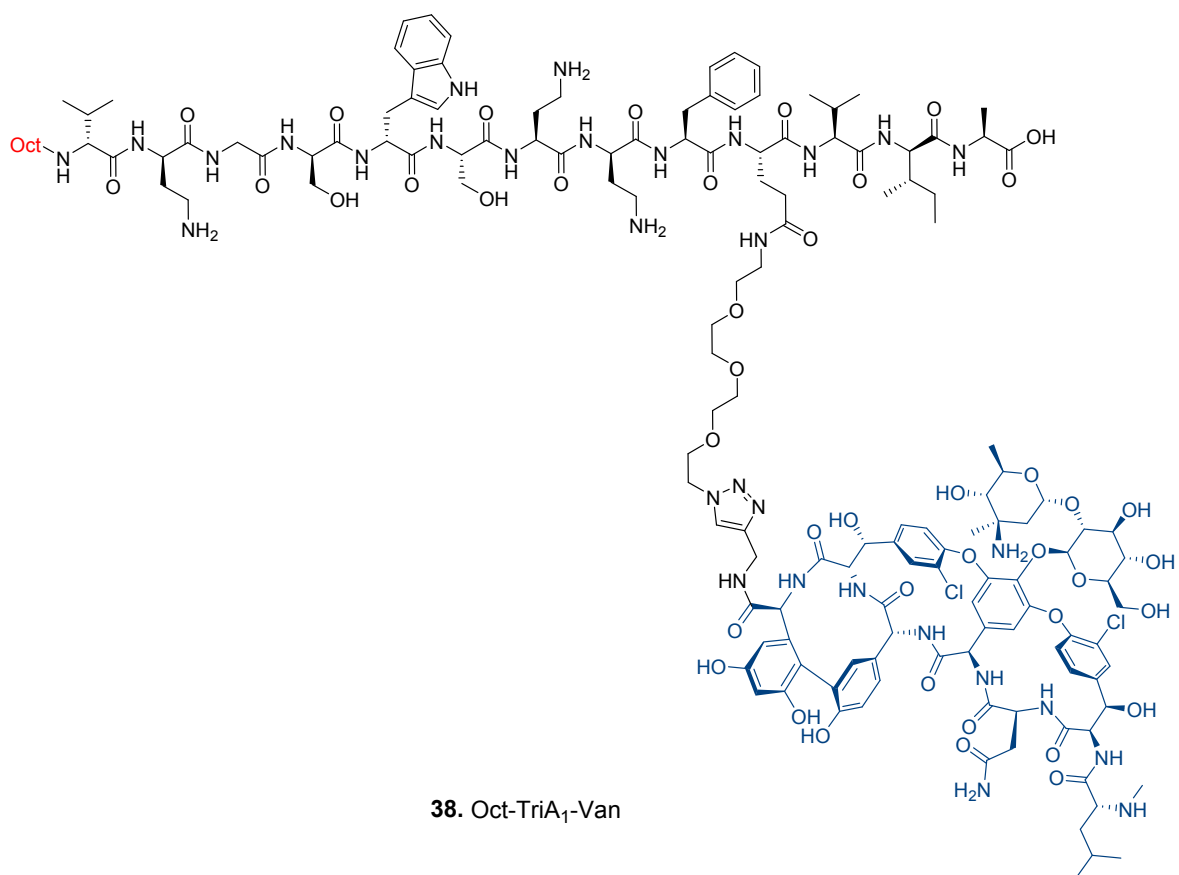



**Table S4.** MIC values of Tridecaptin-Antibiotic conjugates against various bacterial strains.

| Analogue  | MIC ( $\mu\text{g/mL}$ )     |                                 |                              |                                   |                                |
|-----------|------------------------------|---------------------------------|------------------------------|-----------------------------------|--------------------------------|
|           | <i>E. coli</i><br>ATCC 25922 | <i>K. pneumoniae</i> ATCC 13883 | MDR <i>Kp</i><br>ATCC 700603 | <i>A. baumannii</i><br>ATCC 19606 | MDR <i>Ab</i> ATCC<br>BAA-1605 |
| <b>35</b> | 50                           | 50                              | 200                          | 50                                | 25                             |
| <b>36</b> | 12.5                         | 3.13                            | 12.5                         | 6.25                              | 6.25                           |
| <b>37</b> | 25                           | 100                             | 200                          | 25                                | 25                             |
| <b>38</b> | 12.5                         | 100                             | 25                           | 25                                | 50                             |
| <b>39</b> | 25                           | 50                              | 100                          | 25                                | 50                             |
| <b>40</b> | 3.13                         | 6.25                            | 100                          | 6.25                              | 6.25                           |

## Key Residues in Octyl-Tridecaptin A<sub>1</sub> Analogues Linked to Stable Secondary Structures in the Membrane

Cochrane, S. A.; Findlay, B.; Vederas, J. C.; Ratemi, E. S. *ChemBioChem* **2014**, 15 (9), 1295-1299.

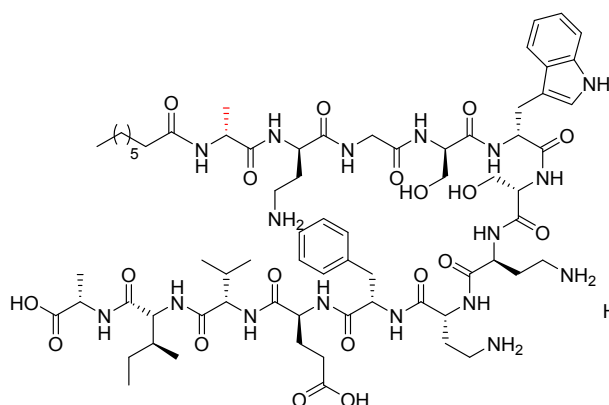

41. Oct-TriA<sub>1</sub> (D-Ala1)

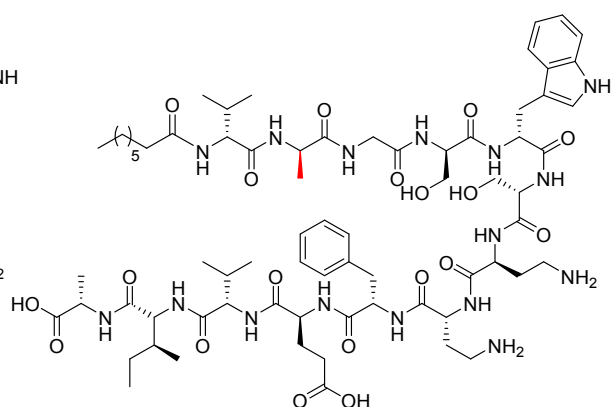

42. Oct-TriA<sub>1</sub> (D-Ala2)

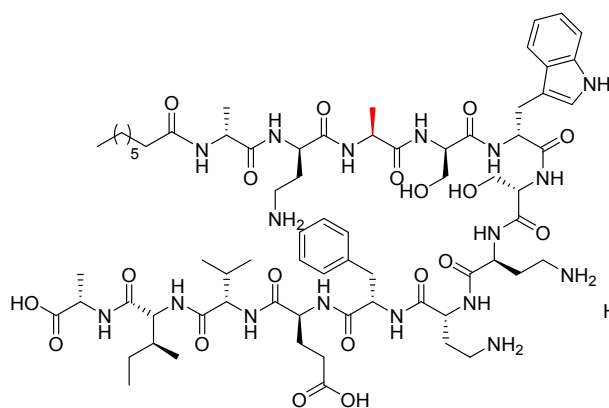

43. Oct-TriA<sub>1</sub> (Ala3)

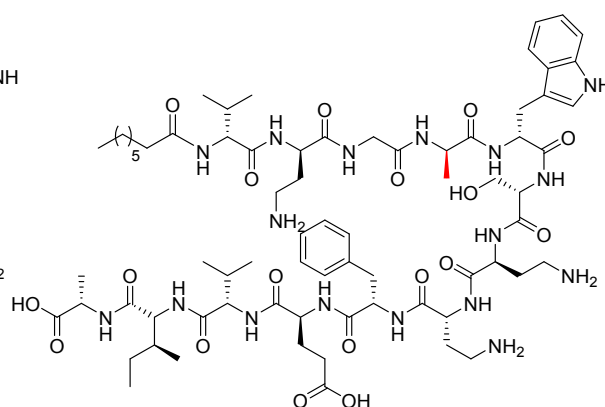

44. Oct-TriA<sub>1</sub> (D-Ala4)

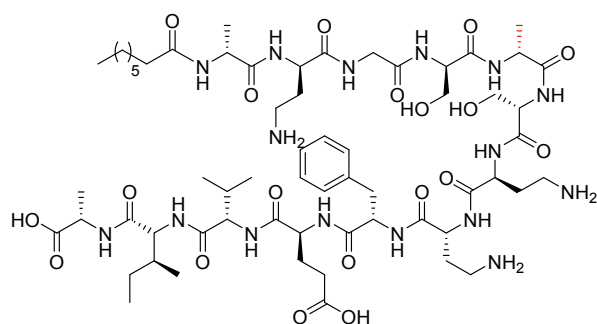

45. Oct-TriA<sub>1</sub> (D-Ala5)

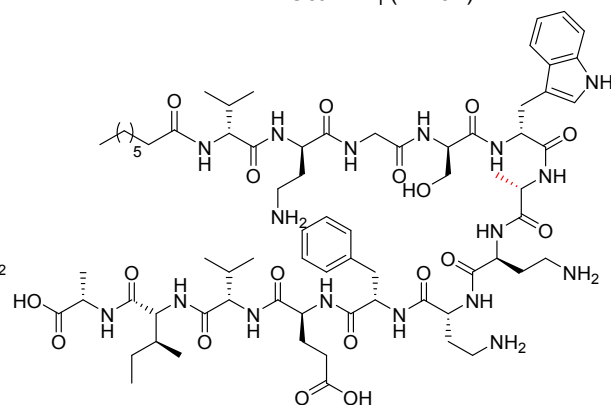

46. Oct-TriA<sub>1</sub> (Ala6)

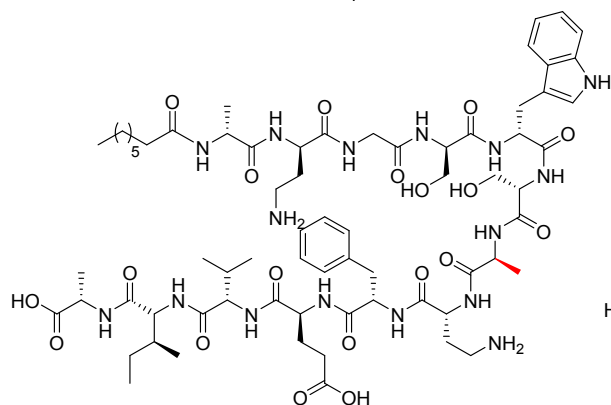

47. Oct-TriA<sub>1</sub> (Ala7)

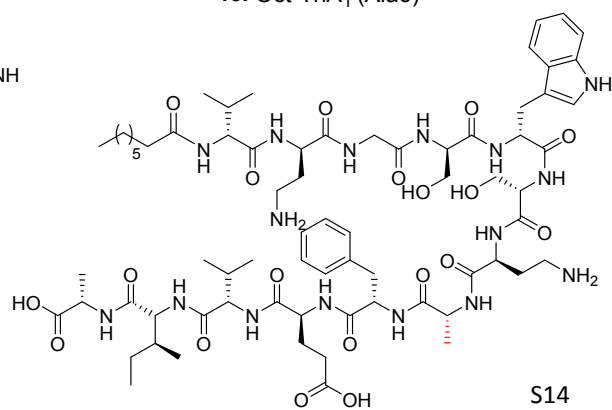

48. Oct-TriA<sub>1</sub> (D-Ala8)

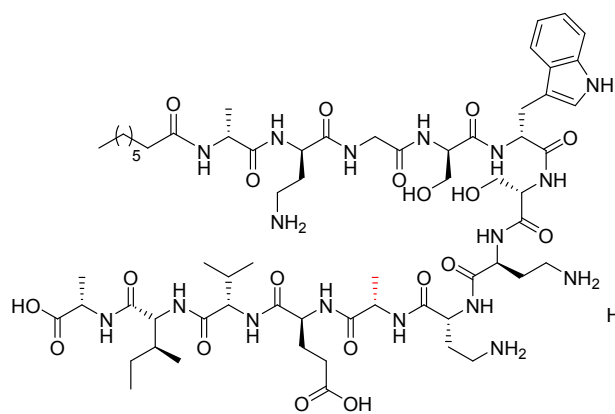

**49. Oct-TriA<sub>1</sub> (Ala9)**

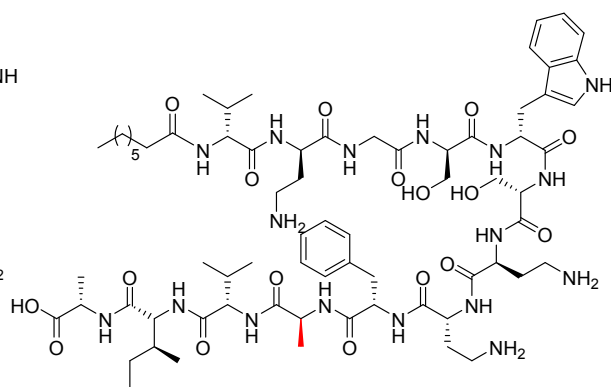

**50. Oct-TriA<sub>1</sub> (Ala10)**

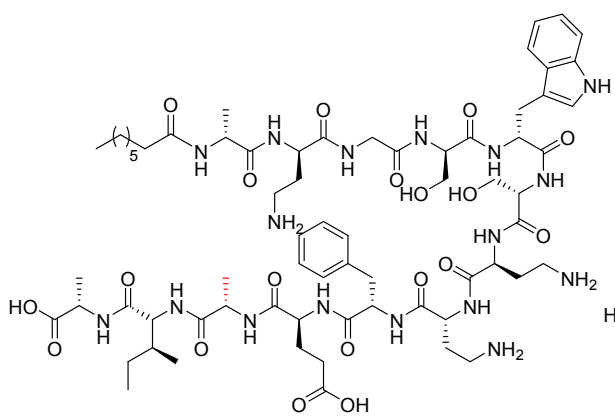

**51. Oct-TriA<sub>1</sub> (Ala11)**

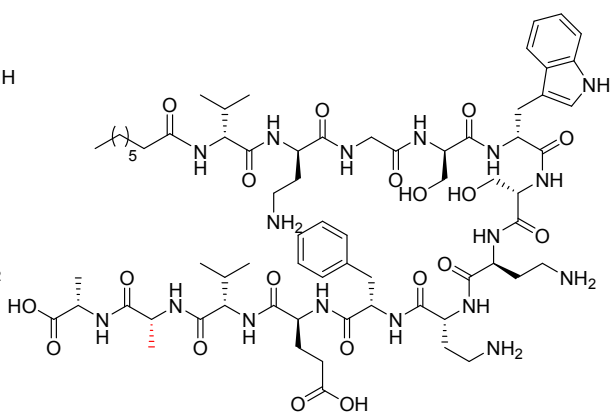

**52. Oct-TriA<sub>1</sub> (D-Ala12)**

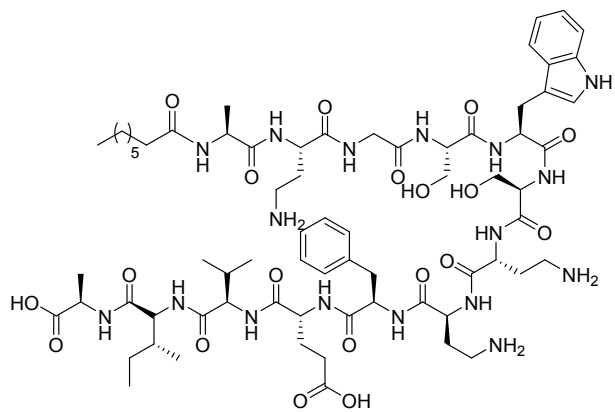

**53. Ent-Oct-TriA<sub>1</sub>**



**Table S5.** MIC values of alanine derivatives of Oct-TriA<sub>1</sub> against various bacterial strains.

*Cochrane, S. A.; Findlay, B.; Vederas, J. C.; Ratemi, E. S. ChemBioChem* **2014**, *15* (9), 1295–1299.

| Analogue  | MIC (µg/mL)                     |                                     |                                    |                                   |                                    |                                   |                                     |                                   |                                       |                                    |
|-----------|---------------------------------|-------------------------------------|------------------------------------|-----------------------------------|------------------------------------|-----------------------------------|-------------------------------------|-----------------------------------|---------------------------------------|------------------------------------|
|           | <i>E. coli</i><br>ATCC<br>25922 | <i>S. enterica</i><br>ATCC<br>13311 | <i>P. aeruginosa</i><br>ATCC 27853 | <i>C. jejuni</i><br>NCTC<br>11168 | <i>K. pneumoniae</i><br>ATCC 13883 | <i>A. baumannii</i><br>ATCC 19606 | <i>E. faecalis</i><br>ATCC<br>29212 | <i>S. aureus</i><br>ATCC<br>29213 | <i>L. monocytogenes</i><br>ATCC 15313 | <i>E. faecium</i><br>ATCC<br>19434 |
| <b>16</b> | 3.13                            | 6.25                                | 25                                 | 1.56                              | 3.13                               | 12.5                              | 100                                 | 100                               | 25                                    | 50                                 |
| <b>41</b> | 6.25                            | 6.25                                | 25                                 | 1.56                              | 3.13                               | 25                                | >100                                | >100                              | >100                                  | >100                               |
| <b>42</b> | 12.5                            | 12.5                                | >100                               | 12.5                              | 6.25                               | >100                              | >100                                | >100                              | >100                                  | >100                               |
| <b>43</b> | 3.13                            | 12.5                                | 100                                | 6.25                              | 6.25                               | 50                                | >100                                | >100                              | >100                                  | >100                               |
| <b>44</b> | 6.25                            | 6.25                                | 25                                 | 6.25                              | 6.25                               | 12.5                              | >100                                | >100                              | >100                                  | >100                               |
| <b>45</b> | 25                              | 100                                 | 100                                | 50                                | 50                                 | 100                               | >100                                | >100                              | >100                                  | >100                               |
| <b>46</b> | 3.13                            | 6.25                                | 100                                | 6.25                              | 6.25                               | 12.5                              | >100                                | >100                              | >100                                  | >100                               |
| <b>47</b> | 12.5                            | 25                                  | >100                               | 12.5                              | 12.5                               | 25                                | >100                                | >100                              | >100                                  | >100                               |
| <b>48</b> | >100                            | >100                                | >100                               | >100                              | >100                               | >100                              | >100                                | >100                              | >100                                  | >100                               |
| <b>49</b> | 12.5                            | 12.5                                | 50                                 | 6.25                              | 12.5                               | 100                               | >100                                | >100                              | >100                                  | >100                               |
| <b>50</b> | 6.25                            | 6.25                                | 12.5                               | 3.13                              | 6.25                               | 25                                | >100                                | >100                              | 25                                    | >100                               |
| <b>51</b> | 6.25                            | 12.5                                | 25                                 | 3.13                              | 6.25                               | 50                                | >100                                | >100                              | >100                                  | >100                               |
| <b>52</b> | 50                              | 25                                  | 50                                 | 12.5                              | 25                                 | >100                              | >100                                | >100                              | >100                                  | >100                               |
| <b>53</b> | 12.5                            | 12.5                                | 25                                 | 12.5                              | 12.5                               | 12.5                              | 100                                 | 100                               | 100                                   | 100                                |

## Rational design of new cyclic analogues of the antimicrobial lipopeptide tridecaptin A<sub>1</sub>

Ballantine, R. D.; Li, Y. X.; Qian, P. Y.; Cochrane, S. A. *Chem. Commun.* **2018**, 54, 10634-10637.

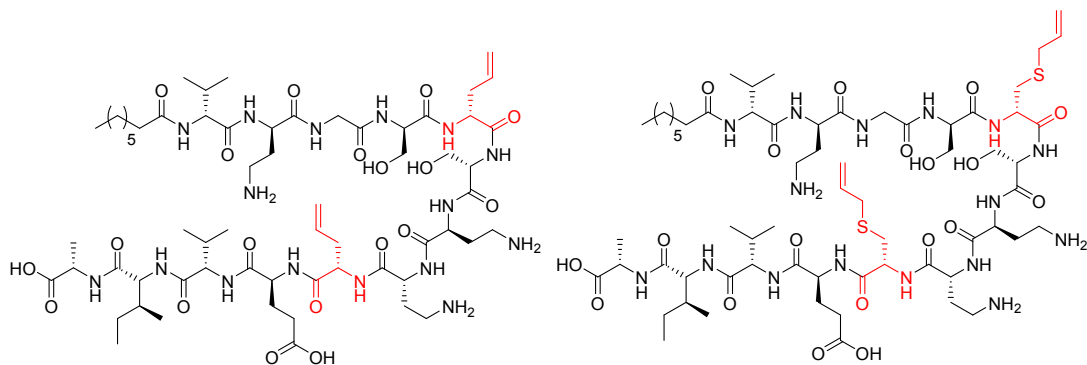

54. Oct-TriA<sub>1</sub> (D-Agl5, Agl9)

55. Oct-TriA<sub>1</sub> (D-Sac5, Sac9)

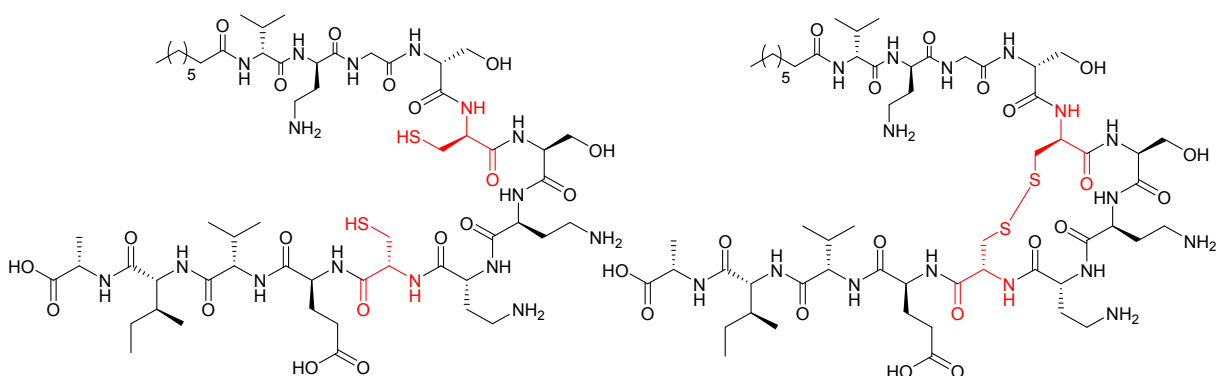

56. Oct-TriA<sub>1</sub> (D-Cys5, Cys9)

57. Oct-cTriA<sub>1</sub> (SS)

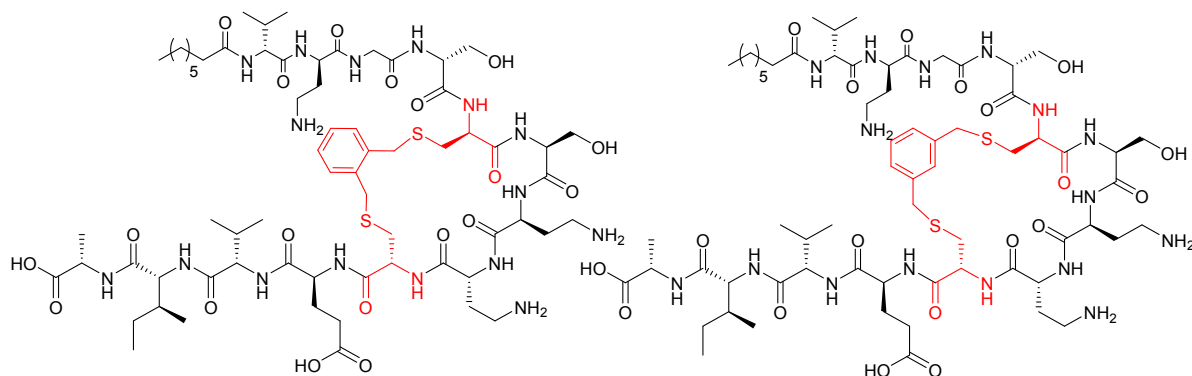

58. Oct-cTriA<sub>1</sub> (o-Xyl)

59. Oct-cTriA<sub>1</sub> (m-Xyl)

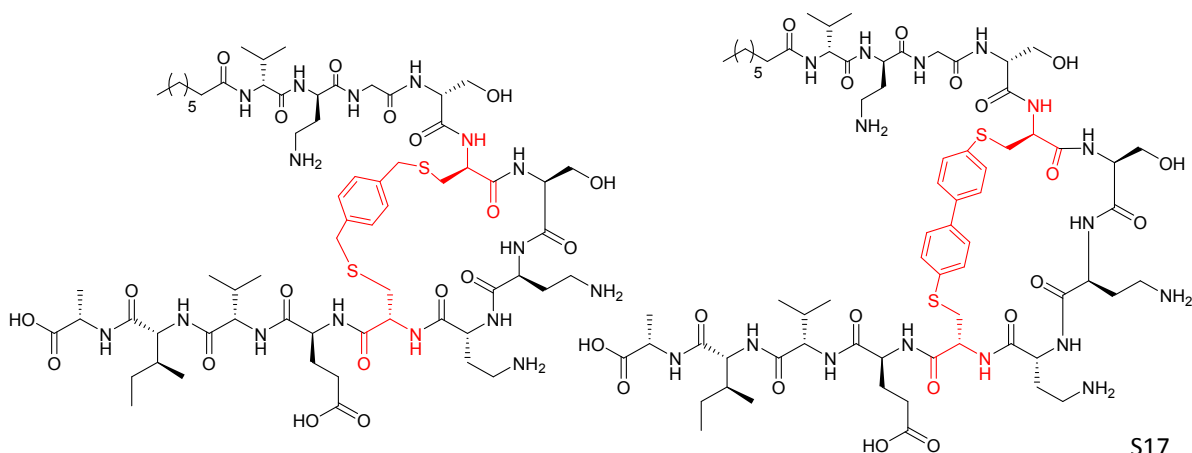

60. Oct-cTriA<sub>1</sub> (p-Xyl)

61. Oct-cTriA<sub>1</sub> (Biphenyl)



Ballantine, R. D.; Li, Y. X.; Qian, P. Y.; Cochrane, S. A. *Chem. Commun.* **2018**, *54*, 10634–10637.

| Analogue  | MIC (µg/mL)               |                             |                                |                                |                             |
|-----------|---------------------------|-----------------------------|--------------------------------|--------------------------------|-----------------------------|
|           | <i>E. coli</i> NCTC 12241 | <i>S. aureus</i> NCTC 10788 | <i>K. pneumoniae</i> NCTC 9633 | <i>A. baumannii</i> NCTC 13304 | <i>E. cloacae</i> NCTC 5920 |
| <b>16</b> | 0.39                      | 25                          |                                |                                |                             |
| <b>54</b> | >50                       | >50                         |                                |                                |                             |
| <b>55</b> | >50                       | >50                         |                                |                                |                             |
| <b>56</b> | >50                       | >50                         |                                |                                |                             |
| <b>57</b> | >50                       | >50                         |                                |                                |                             |
| <b>58</b> | 6.3                       | >50                         | 6.3                            | 6.3                            | 12.5                        |
| <b>59</b> | 6.3                       | >50                         | 6.3                            | 12.5                           | 12.5                        |
| <b>60</b> | 6.3                       | >50                         | 6.3                            | 12.5                           | 12.5                        |
| <b>61</b> | >50                       | >50                         | >50                            | >50                            | >50                         |

**Table S6.** MIC values of cyclic Oct-TriA<sub>1</sub> analogues against various bacterial strains.

## Tridecaptin-inspired antimicrobial peptides with activity against multidrug-resistant Gram-negative bacteria

Ballantine, R. D.; McCallion, C. E.; Nassour, E.; Tokajian, S.; Cochrane, S. A.

*MedChemComm* **2019**, *10*, 484-487.

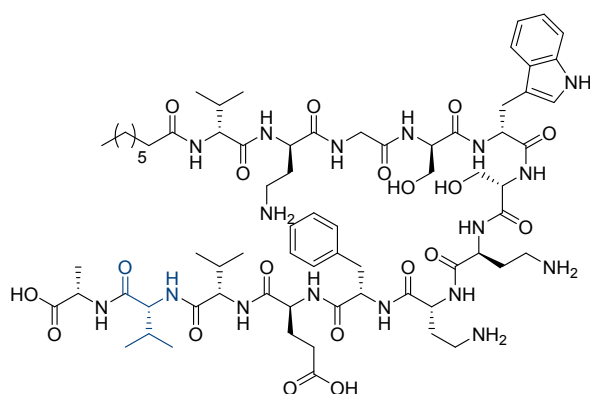

**62.** Oct-TriA<sub>2</sub>

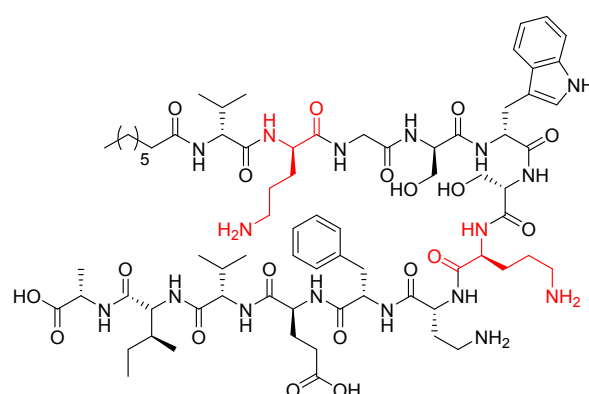

**63.** Oct-TriA<sub>1</sub> (D-Orn2, Orn7)

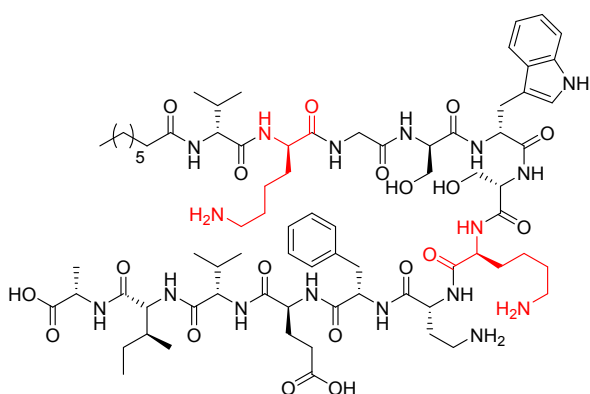

**64.** Oct-TriA<sub>1</sub> (D-Lys2, Lys7)

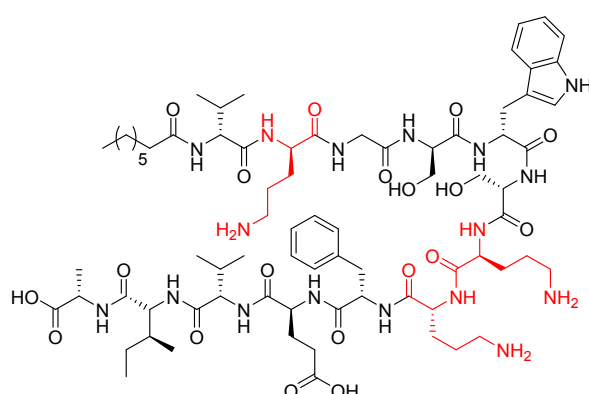

**65.** Oct-TriA<sub>1</sub> (D-Orn2,8, Orn7)

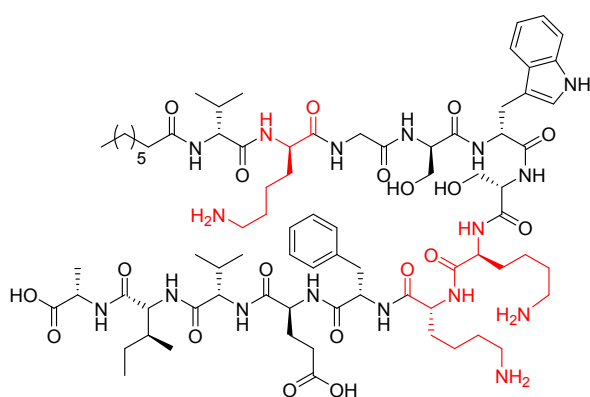

**66.** Oct-TriA<sub>1</sub> (D-Lys2,8, Lys7)

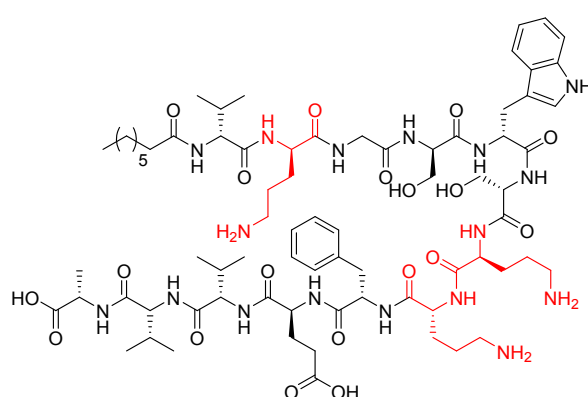

**67.** Oct-TriA<sub>2</sub> (D-Orn2,8, Orn7)

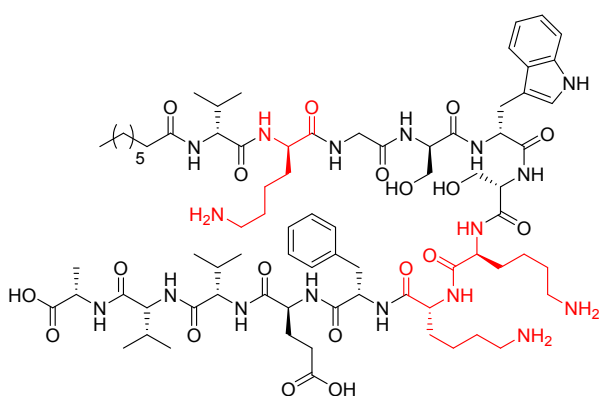

**68.** Oct-TriA<sub>2</sub> (D-Lys2,8, Lys7)



**Table S7.** MIC values for economical Oct-TriA<sub>1</sub> and A<sub>2</sub> analogues against various bacterial strains.

*Ballantine, R. D.; McCallion, C. E.; Nassour, E.; Tokajian, S.; Cochrane, S. A. MedChemComm 2019, 10, 484–487.*

| Analogue  | MIC (µg/mL)         |                     |                     |                   |                      |                      |                      |                      |                      |                      |                             |
|-----------|---------------------|---------------------|---------------------|-------------------|----------------------|----------------------|----------------------|----------------------|----------------------|----------------------|-----------------------------|
|           | <i>A. baumannii</i> | <i>Ab</i><br>ACM 11 | <i>Ab</i><br>ACM 29 | <i>E. cloacae</i> | <i>K. pneumoniae</i> | <i>Kp</i><br>IMP 170 | <i>Kp</i><br>IMP 177 | <i>Kp</i><br>IMP 204 | <i>Kp</i><br>IMP 216 | <i>Kp</i><br>IMP 485 | <i>P. Pseudoalcaligenes</i> |
| <b>16</b> | 12.5                | 25                  | 25                  | 3.13              | 6.25                 | 6.25                 | 6.25                 | 12.5                 | 6.25                 | 6.25                 | 50                          |
| <b>62</b> | 25                  | 100                 | 50                  | 6.25              | 12.5                 | 12.5                 | 25                   | 12.5                 | 12.5                 | 12.5                 | 50                          |
| <b>63</b> | 100                 | 50                  | 50                  | 25                | 100                  | 25                   | 25                   | 25                   | 25                   | 25                   | 12.5                        |
| <b>64</b> | 50                  | 25                  | 50                  | 25                | 50                   | 25                   | 25                   | 25                   | 25                   | 25                   | 25                          |
| <b>65</b> | 12.5                | 50                  | 50                  | 6.25              | 12.5                 | 25                   | 25                   | 25                   | 6.25                 | 25                   | 50                          |
| <b>66</b> | 6.25                | 25                  | 25                  | 25                | 50                   | 50                   | 25                   | 50                   | 25                   | 25                   | 100                         |
| <b>67</b> | 25                  | 25                  | 50                  | 12.5              | 50                   | 25                   | 12.5                 | 12.5                 | 12.5                 | 12.5                 | 6.25                        |
| <b>68</b> | >100                | >100                | >100                | >100              | >100                 | >100                 | >100                 | >100                 | >100                 | >100                 | >100                        |

**Table S8.** Haemolytic activity of economical Oct-TriA<sub>1</sub> and A<sub>2</sub> analogues.

| <i>Ballantine, R. D.; McCallion, C. E.; Nassour, E.; Tokajian, S.; Cochrane, S. A. MedChemComm 2019, 10, 484–487.</i> |                                 |
|-----------------------------------------------------------------------------------------------------------------------|---------------------------------|
| <b>Analogue<sup>a</sup></b>                                                                                           | <b>% haemolysis<sup>b</sup></b> |
| <b>16</b>                                                                                                             | 89.6                            |
| <b>62</b>                                                                                                             | 52.1                            |
| <b>63</b>                                                                                                             | 66.7                            |
| <b>64</b>                                                                                                             | 71.4                            |
| <b>65</b>                                                                                                             | 77.5                            |
| <b>66</b>                                                                                                             | 86.4                            |
| <b>67</b>                                                                                                             | 39.8                            |
| <b>68</b>                                                                                                             | 2.8                             |

<sup>a</sup> All peptides were tested at 100 µg/mL. <sup>b</sup> Haemolytic assays were run in triplicate. Absorbance of each sample was measured at 415 nm and percent haemolysis due to the corresponding peptide was calculated relative to Triton X-100 (taken as 100%).



## A Chemical-Intervention Strategy To Circumvent Peptide Hydrolysis by D-Stereoselective Peptidases

Bann, S. J.; Ballantine, R. D.; McCallion, C. E.; Qian, P.-Y.; Li, Y.-X.; Cochrane, S. A. *J. Med. Chem.*

2019, 62, 10466-10472.

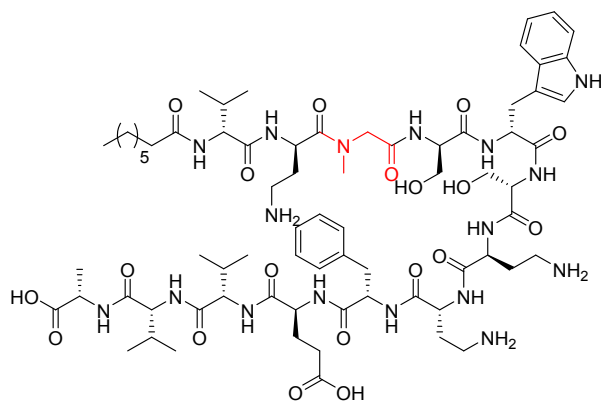

69. Oct-TriA<sub>2</sub> (Sar3)

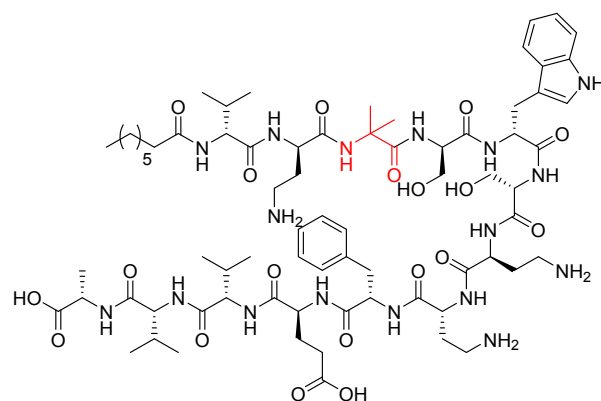

70. Oct-TriA<sub>2</sub> (Aib3)

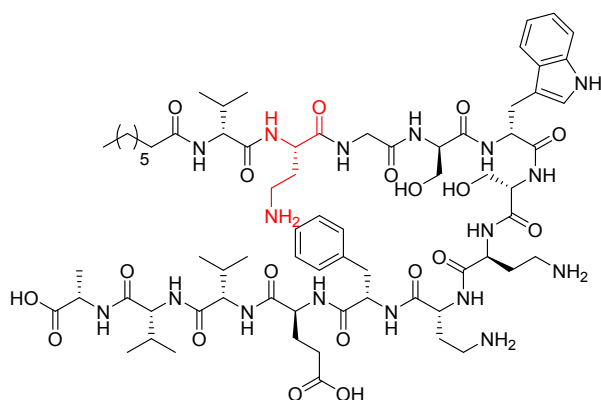

71. Oct-TriA<sub>2</sub> (Dab2)

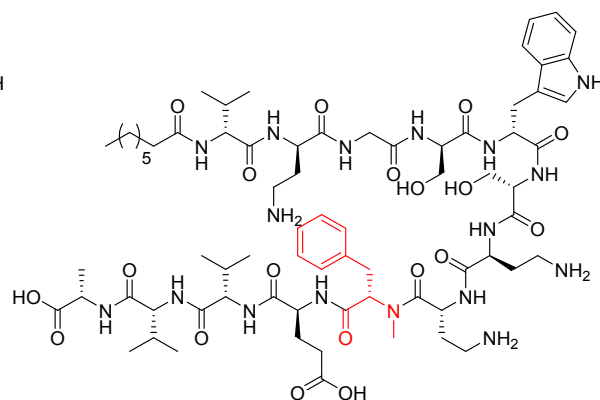

72. Oct-TriA<sub>2</sub> (NMePhe9)

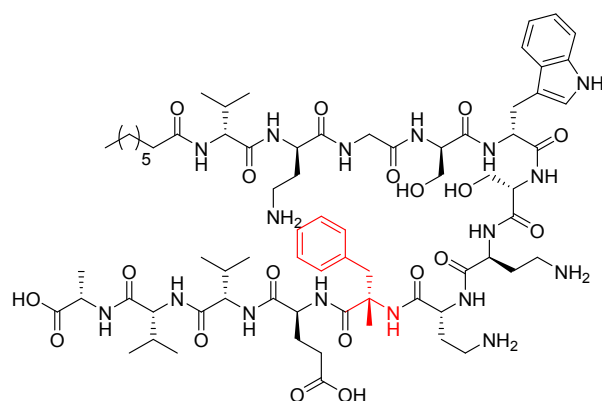

73. Oct-TriA<sub>2</sub> ( $\alpha$ MePhe9)

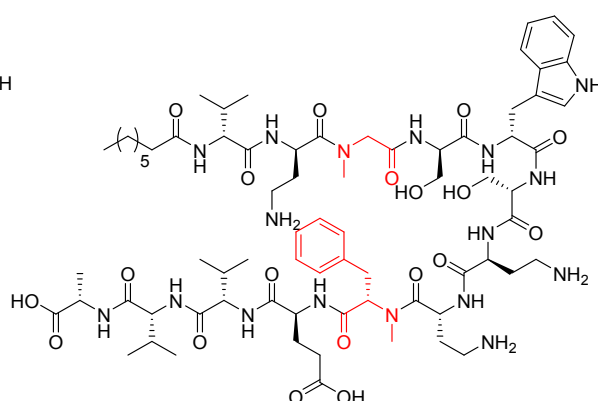

74. Oct-TriA<sub>2</sub> (Sar3, NMePhe9)

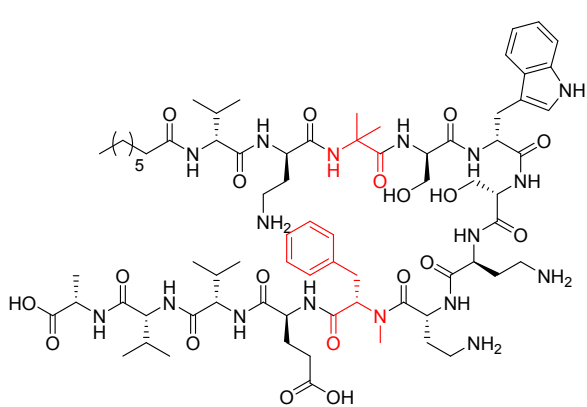

75. Oct-TriA<sub>2</sub> (Aib3, NMePhe9)

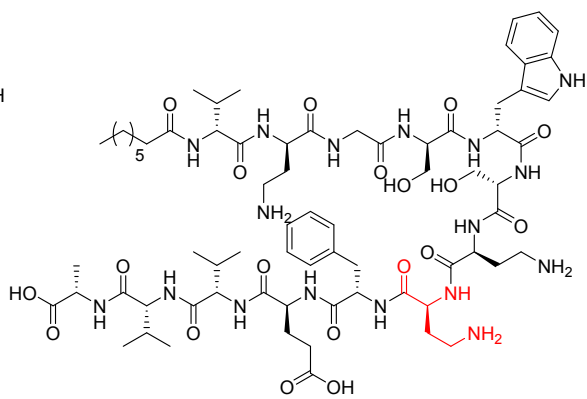

76. Oct-TriA<sub>2</sub> (Dab8)

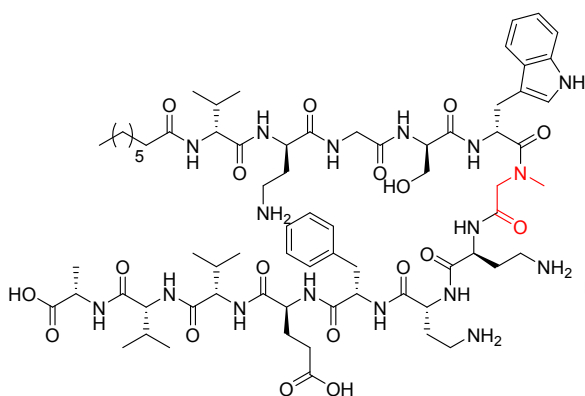

77. Oct-TriA<sub>2</sub> (Sar6)

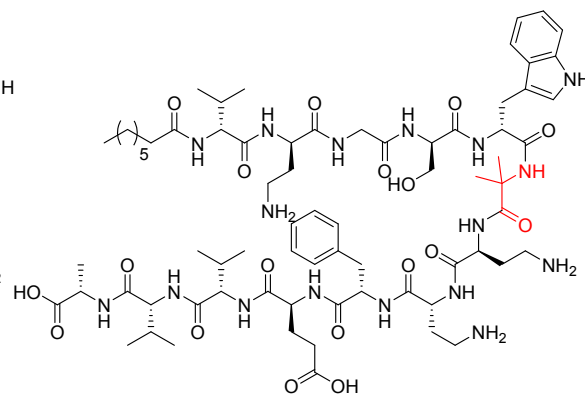

78. Oct-TriA<sub>2</sub> (Aib6)

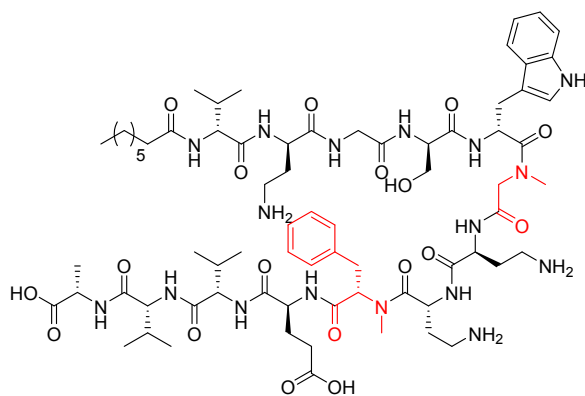

79. Oct-TriA<sub>2</sub> (Sar6, NMePhe9)

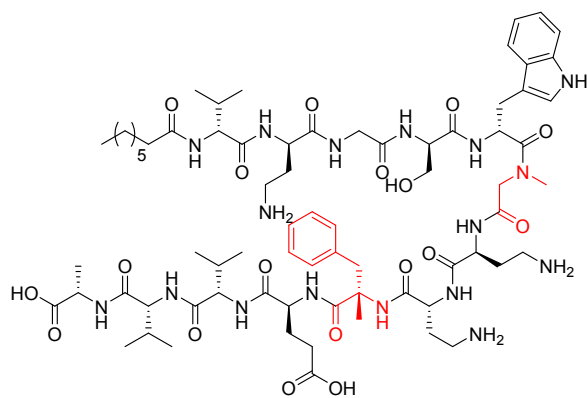

80. Oct-TriA<sub>2</sub> (Sar6,  $\alpha$ MePhe9)

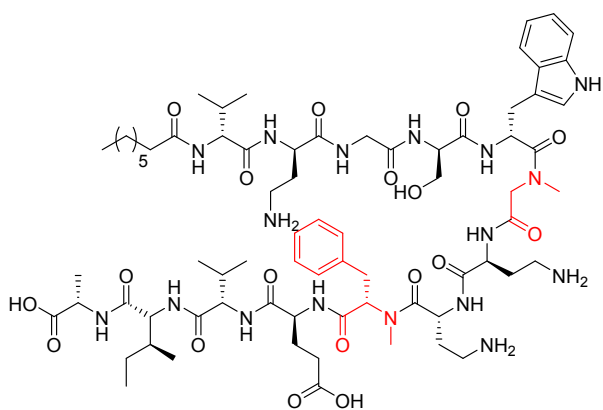

**81.** Oct-TriA<sub>1</sub> (Sar6, NMePhe9)

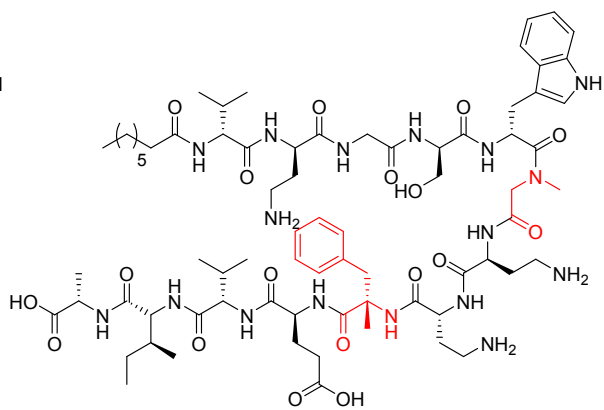

**82.** Oct-TriA<sub>1</sub> (Sar6,  $\alpha$ MePhe9)

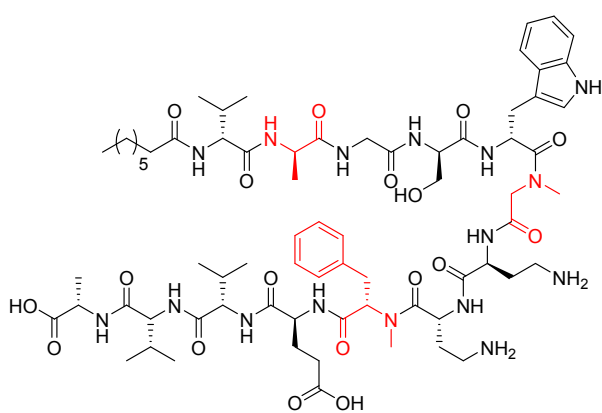

**83.** Oct-TriA<sub>2</sub> (D-Ala2, Sar6, NMePhe9)

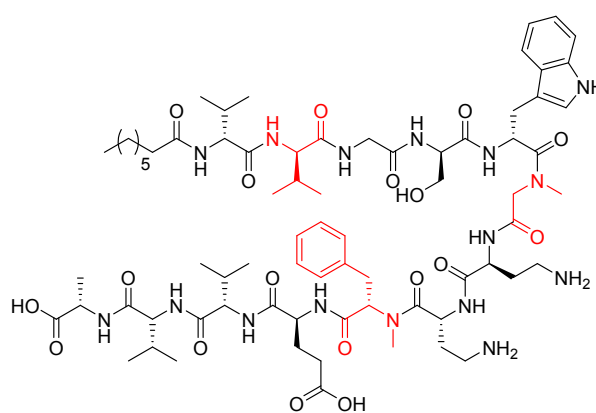

**84.** Oct-TriA<sub>2</sub> (D-Val2, Sar6, NMePhe9)

**Table S9.** MIC values of stabilised Oct-TriA<sub>1</sub> and A<sub>2</sub> analogues against representative Gram-negative and positive bacteria.

| <i>Bann, S. J.; Ballantine, R. D.; McCallion, C. E.; Qian, P.-Y.; Li, Y.-X.; Cochrane, S. A. J. Med. Chem. 2019, 62, 10466–10472.</i> |                           |                             |
|---------------------------------------------------------------------------------------------------------------------------------------|---------------------------|-----------------------------|
| Analogue                                                                                                                              | MIC (µg/mL)               |                             |
|                                                                                                                                       | <i>E. coli</i> NCTC 12241 | <i>S. aureus</i> NCTC 10788 |
| 62                                                                                                                                    | 1.56                      | 50                          |
| 69                                                                                                                                    | >50                       | >50                         |
| 70                                                                                                                                    | >50                       | >50                         |
| 71                                                                                                                                    | >50                       | >50                         |
| 72                                                                                                                                    | 6.25                      | >50                         |
| 73                                                                                                                                    | >50                       | >50                         |
| 74                                                                                                                                    | >50                       | >50                         |
| 75                                                                                                                                    | >50                       | >50                         |
| 76                                                                                                                                    | ND                        | ND                          |
| 77                                                                                                                                    | 3.13                      | >50                         |
| 78                                                                                                                                    | 3.13                      | >50                         |
| 79                                                                                                                                    | 6.25                      | >50                         |
| 80                                                                                                                                    | >50                       | >50                         |
| 81                                                                                                                                    | 3.13                      | >50                         |
| 82                                                                                                                                    | >50                       | >50                         |
| 83                                                                                                                                    | >50                       | >50                         |
| 84                                                                                                                                    | >50                       | >50                         |

**Table S10.** Haemolytic activity of stabilised Oct-TriA<sub>2</sub> analogues.

| <i>Bann, S. J.; Ballantine, R. D.; McCallion, C. E.; Qian, P.-Y.; Li, Y.-X.; Cochrane, S. A. J. Med. Chem. 2019, 62, 10466–10472.</i> |                           |
|---------------------------------------------------------------------------------------------------------------------------------------|---------------------------|
| Analogue <sup>a</sup>                                                                                                                 | % haemolysis <sup>b</sup> |
| 62                                                                                                                                    | 53                        |
| 72                                                                                                                                    | 30                        |
| 77                                                                                                                                    | 38                        |
| 79                                                                                                                                    | 60                        |
| 83                                                                                                                                    | 78                        |

<sup>a</sup> All peptides were tested at 100 µg/mL. <sup>b</sup> Haemolytic assays were run in triplicate. Absorbance of each sample was measured at 415 nm and percent haemolysis due to the corresponding peptide was calculated relative to Triton X-100 (taken as 100%).

**A tridecaptin-based fluorescent probe for differential staining of Gram-negative bacteria**

Wang, W.; Wang, Y.; Lin, L.; Song, Y.; Yang, C. *J. Anal. Bioanal. Chem.* **2019**, 411, 4017-4023.

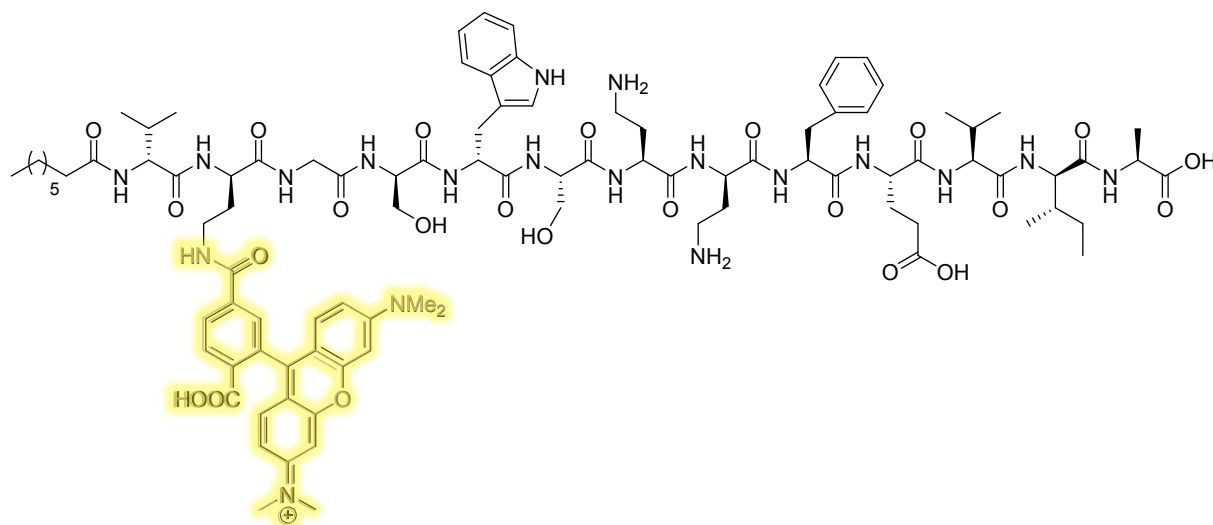

**85.** TriA-TAMRA

**Studies on tridecaptin B<sub>1</sub>, a lipopeptide with activity against multidrug resistant**

**Gram-negative bacteria**

Cochrane, S. A.; Lohans, C. T.; van Belkum, M. J.; Bels, M. A.; Vederas, J. C.

*Org. Biomol. Chem.* **2015**, 13 (21), 6073-6081.

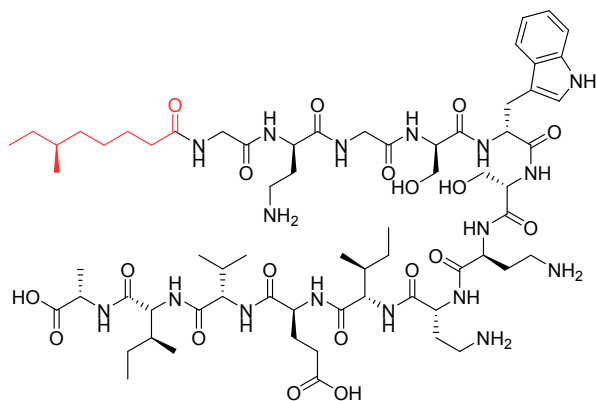

**86. Natural TriB<sub>1</sub>**

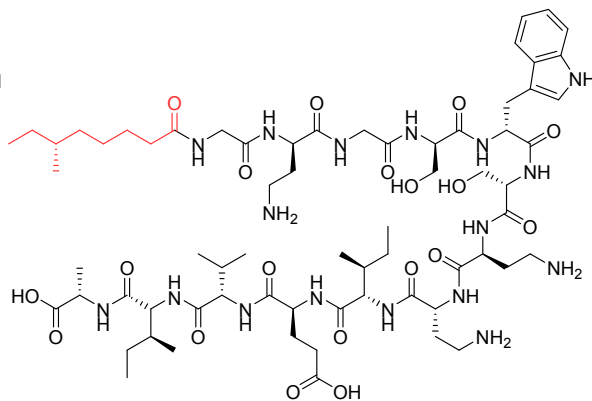

**87. (6'R)-TriB<sub>1</sub>**

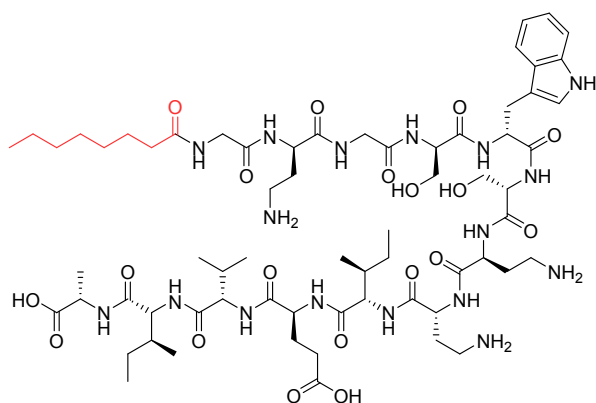

**88. Oct-TriB<sub>1</sub>**

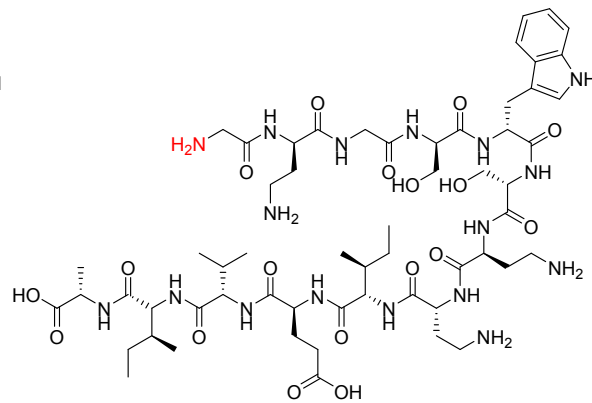

**89. H-TriB<sub>1</sub>**

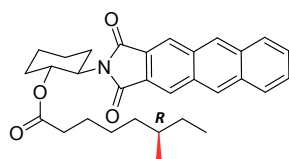

**90. (6R)-methyl anthracenyl derivative**

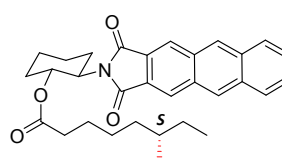

**91. (6S)-methyl anthracenyl derivative**

**Table S11.** MIC values of TriB<sub>1</sub> analogues against various bacterial strains.

| <i>Cochrane, S. A.; Lohans, C. T.; van Belkum, M. J.; Bels, M. A.; Vederas, J. C. Org. Biomol. Chem. 2015, 13 (21), 6073–6081.</i> |                                 |                                     |                                              |                                              |                                                  |                                                |                                                   |                                     |                                   |                                                |                                                  |
|------------------------------------------------------------------------------------------------------------------------------------|---------------------------------|-------------------------------------|----------------------------------------------|----------------------------------------------|--------------------------------------------------|------------------------------------------------|---------------------------------------------------|-------------------------------------|-----------------------------------|------------------------------------------------|--------------------------------------------------|
| Analogue                                                                                                                           | MIC (µg/mL)                     |                                     |                                              |                                              |                                                  |                                                |                                                   |                                     |                                   |                                                |                                                  |
|                                                                                                                                    | <i>E. coli</i><br>ATCC<br>25922 | <i>S. enterica</i><br>ATCC<br>13311 | <i>P.</i><br><i>aeruginosa</i><br>ATCC 27853 | <i>K.</i><br><i>pneumoniae</i><br>ATCC 13883 | <i>K.</i><br><i>pneumoniae</i><br>ATCC<br>700603 | <i>A.</i><br><i>baumannii</i><br>ATCC<br>19606 | <i>A.</i><br><i>baumannii</i><br>ATCC<br>BAA 1605 | <i>E. faecalis</i><br>ATCC<br>29212 | <i>S. aureus</i><br>ATCC<br>29213 | <i>Bacillus</i><br><i>cereus</i><br>ATCC 21928 | <i>Bacillus</i><br><i>mycoides</i><br>ATCC 21929 |
| <b>86</b>                                                                                                                          | 6.25                            | 3.13                                | 12.5                                         | 6.25                                         | 3.13                                             | 25                                             | 25                                                | >100                                | >100                              | >100                                           | >100                                             |
| <b>87</b>                                                                                                                          | 12.5                            | 6.25                                | 25                                           | 6.25                                         | 6.25                                             | 50                                             | 25                                                | >100                                | >100                              | >100                                           | >100                                             |
| <b>88</b>                                                                                                                          | 12.5                            | 12.5                                | 25                                           | 12.5                                         | 6.25                                             | 50                                             | 50                                                | >100                                | >100                              | >100                                           | >100                                             |
| <b>89</b>                                                                                                                          | >100                            | >100                                | >100                                         | >100                                         | >100                                             | >100                                           | >100                                              | >100                                | >100                              | >100                                           | >100                                             |



**Tridecaptin M, a New Variant Discovered in Mud Bacterium, Shows Activity against Colistin- and Extremely Drug-Resistant *Enterobacteriaceae***

Jangra, M.; Kaur, M.; Tambat, R.; Rana, R.; Maurya, S. K.; Khatri, N.; Ghafur, A.; Nandanwar, H. *Antimicrob. Agents Chemother.* **2019**, 63 (6), e00338-19.

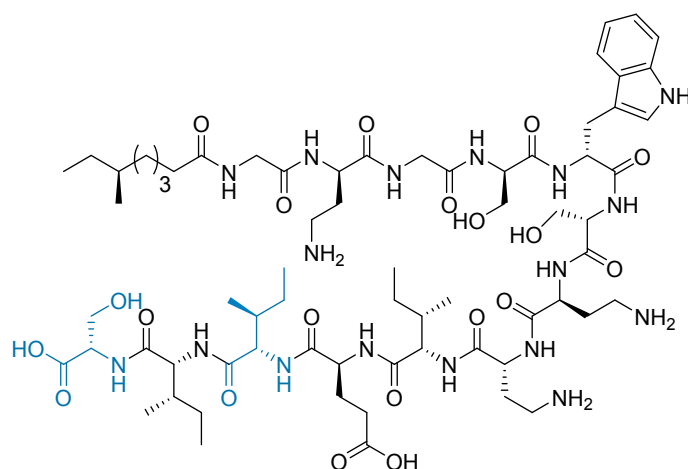

**92.** TriM<sub>1</sub>

**Table S12.** MIC values of TriM<sub>1</sub> against various bacterial strains.

*Jangra, M.; Kaur, M.; Tambat, R.; Rana, R.; Maurya, S. K.; Khatri, N.; Ghafur, A.; Nandanwar, H. Antimicrob. Agents Chemother.* **2019**, 63 (6), e00338-19.

| Strain                                                                       | MIC (µg/mL) |
|------------------------------------------------------------------------------|-------------|
| <i>K. pneumoniae</i> ATCC 700603                                             | 4           |
| <i>Kp</i> ATCC BAA-1705                                                      | 2           |
| <i>Kp</i> ATCC BAA-1706                                                      | 4           |
| <i>Kp</i> ATCC BAA-2146                                                      | 2           |
| <i>Kp</i> ATCC 15380                                                         | 1           |
| <i>Kp</i> ATCC 29665                                                         | 0.5         |
| <i>Kp</i> subsp. <i>rhinoscleromatis</i> ATCC 13384                          | 4           |
| <i>K. oxytoca</i> MTCC 8295                                                  | 2           |
| <i>Enterobacter aerogenes</i> MTCC 10208                                     | 4           |
| <i>E. cloacae</i> MTCC 509                                                   | 4           |
| <i>E. coli</i> ATCC 25922                                                    | 4           |
| <i>Ec</i> ATCC 35218                                                         | 4           |
| <i>Ec</i> 9062 (clinical isolate)                                            | 4           |
| <i>Ec</i> 7932 (clinical isolate)                                            | 4           |
| <i>P. aeruginosa</i> ATCC 27853                                              | 16          |
| <i>A. baumannii</i> ATCC 19606                                               | >32         |
| <i>S. enterica</i> ATCC 10708                                                | 4           |
| <i>K. pneumoniae</i> MDR (polymyxin-sensitive) (19 clinical strains ∴ range) | 2 - 8       |

**Table S13.** MIC values of TriM<sub>1</sub> against colistin-resistant *K. pneumoniae* and MDR *E. coli*.

*Jangra, M.; Kaur, M.; Tambat, R.; Rana, R.; Maurya, S. K.; Khatri, N.; Ghafur, A.; Nandanwar, H. Antimicrob. Agents Chemother. 2019, 63 (6), e00338-19.*

| Strain                                             | MIC (µg/mL) |
|----------------------------------------------------|-------------|
| <b><i>K. pneumoniae</i></b><br>(clinical isolates) |             |
| AH-1                                               | 2           |
| AH-2                                               | 2           |
| AH-3                                               | 2           |
| AH-4                                               | 2           |
| AH-5                                               | 2           |
| AH-6                                               | 2           |
| AH-7                                               | 2           |
| AH-8                                               | 2           |
| AH-9                                               | 2           |
| AH-10                                              | 2           |
| AH-11                                              | 2           |
| AH-12                                              | 2           |
| AH-13                                              | 2           |
| AH-14                                              | 2           |
| AH-15                                              | 2           |
| AH-16                                              | 2           |
| AH-17                                              | 2           |
| AH-18                                              | 2           |
| AH-19                                              | 2           |
| <b><i>E. coli</i></b> (food isolates)              |             |
| CF-23                                              | 4           |
| CF-45                                              | 4           |
| CF-47                                              | 4           |

*Jangra, M.; Kaur, M.; Tambat, R.; Rana, R.; Maurya, S. K.; Khatri, N.; Ghafur, A.; Nandanwar, H. Antimicrob. Agents Chemother. 2019, 63 (6), e00338-19.*

| Analogue | % haemolysis <sup>a</sup> | IC <sub>50</sub> (µg/mL) <sup>b</sup> |
|----------|---------------------------|---------------------------------------|
| 92       | 0                         | >250                                  |

**Table S14.** Toxicity data for TriM<sub>1</sub>.

<sup>a</sup> Haemolysis at 100 µg/mL. However, >50% haemolysis was observed at a peptide concentration of 200 µg/mL. Assays were run in triplicate, with two biological repeats, and absorbance of each sample was measured at 570 nm while percent haemolysis due to the corresponding peptide was calculated relative to Triton X-100 (taken as 100%). <sup>b</sup> Peptide concentrations of 0 – 250 µg/mL were tested against HEK 293 and J774 cell lines. Assays were run in triplicate and compared to PBS standard (taken as 100%).

**Purification and biological activity of natural variants synthesized by tridecaptin M gene cluster and in vitro drug-kinetics of this antibiotic class**

Jangra, M.; Kaur, M.; Podia, M.; Tambat, R.; Singh, V.; Chandal, N.; Mahey, N.; Maurya, N.; Nandanwar, H. *Sci. Rep.* 2019, 9 (18870), doi.org/10.1038/s41598-019-54716-8.

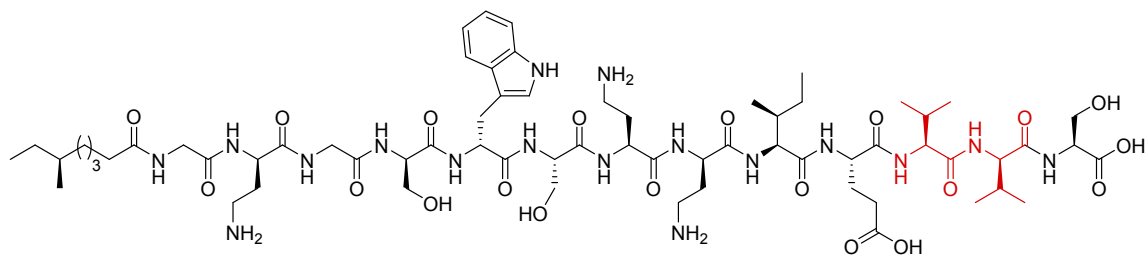

93. TriM<sub>2</sub>

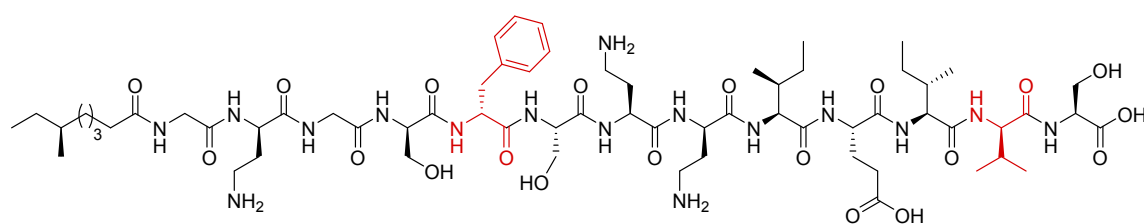

94. TriM<sub>5</sub>

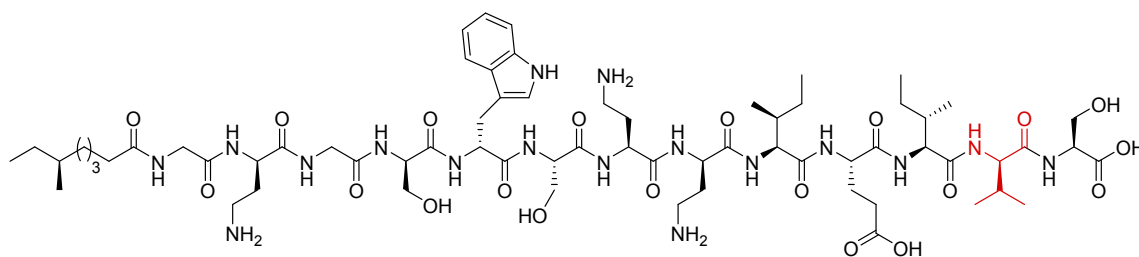

95. TriM<sub>6</sub>

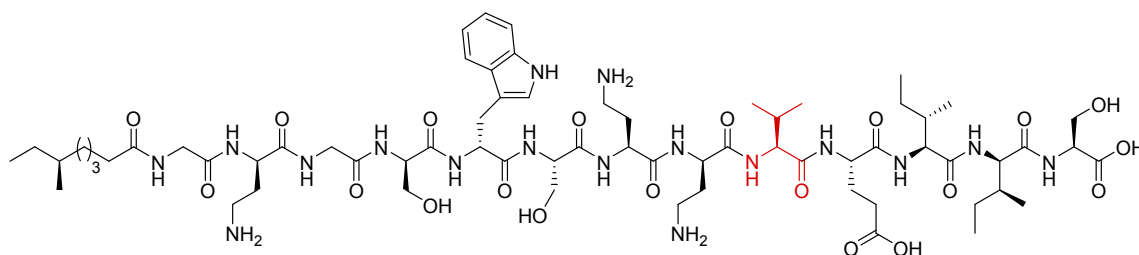

96. TriM<sub>7</sub>

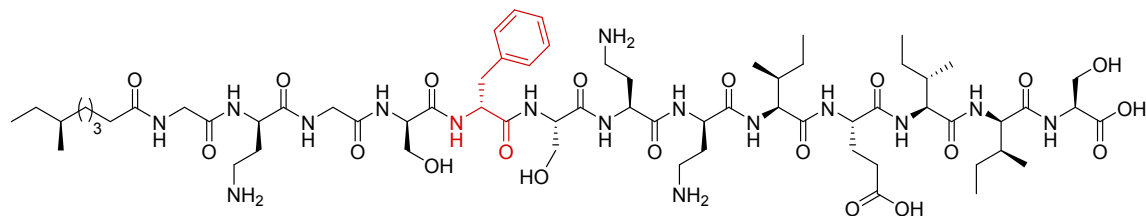

97. TriM<sub>8</sub>

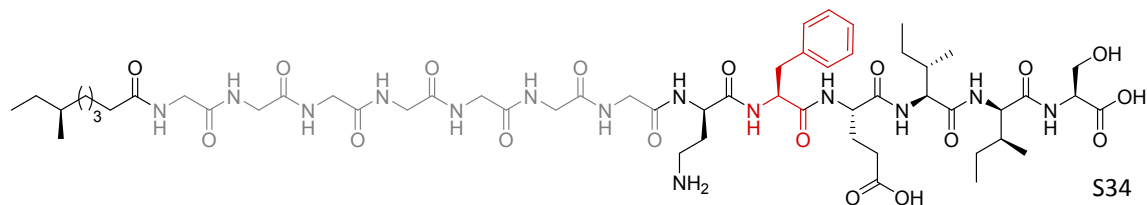

98. TriM<sub>11</sub>:

Residues 1-7 could not be conclusively determined

**Table S15.** MIC values of TriM<sub>1</sub> – M<sub>11</sub> analogues against various bacterial strains.

*Jangra, M.; Kaur, M.; Podia, M.; Tambat, R.; Singh, V.; Chandal, N.; Mahey, N.; Maurya, N.; Nandanwar, H. Sci. Rep. 2019, 9 (18870), doi.org/10.1038/s41598-019-54716-8.*

| Analogue | MIC (µg/mL)               |                            |                             |                       |                        |                             |                          |                       |                       |                         |                          |
|----------|---------------------------|----------------------------|-----------------------------|-----------------------|------------------------|-----------------------------|--------------------------|-----------------------|-----------------------|-------------------------|--------------------------|
|          | K. pneumoniae ATCC 700603 | K. pneumoniae AH-3 (Col-R) | K. pneumoniae AH-16 (Col-R) | E. coli CF-23 (mcr-1) | P. mirabilis MTCC 1429 | Serratia marcescens MTCC 97 | K. pneumoniae P3R (M1-R) | K. pneumoniae GMCH 13 | K. pneumoniae GMCH 15 | A. baumannii ATCC 19606 | P. aeruginosa ATCC 27853 |
| 92       | 4                         | 4                          | 4                           | 4                     | >16                    | 8                           | 64                       | 8                     | 16                    | 64                      | >128                     |
| 93       | 8                         | 8                          | >16                         | 16                    | >16                    | >16                         | >32                      | ND                    | ND                    | >32                     | >32                      |
| 94       | 16                        | 16                         | 16                          | 16                    | 16                     | 8                           | 16                       | ND                    | ND                    | >32                     | >32                      |
| 95       | 4                         | 4                          | 2                           | 4                     | >16                    | 16                          | 16                       | ND                    | ND                    | >32                     | >32                      |
| 96       | 8                         | 8                          | 8                           | 16                    | >16                    | 8                           | 16                       | ND                    | ND                    | >32                     | >32                      |
| 97       | 4                         | 8                          | 4                           | 4                     | >16                    | 16                          | 128                      | ND                    | ND                    | 128                     | >128                     |
| 98       | 2                         | 1                          | 1                           | 1                     | 4                      | 4                           | 8                        | 4                     | 2                     | 4                       | 8                        |

**Table S16.** Haemolytic activity of TriM<sub>1</sub>– TriM<sub>11</sub> analogues.

| <b>Analogue<sup>a</sup></b> | <b>% haemolysis<sup>b</sup></b> |
|-----------------------------|---------------------------------|
| <b>92</b>                   | 10                              |
| <b>93</b>                   | 2                               |
| <b>94</b>                   | 0                               |
| <b>95</b>                   | 17                              |
| <b>96</b>                   | 1                               |
| <b>97</b>                   | 78                              |
| <b>98</b>                   | 50                              |

<sup>a</sup> Peptide concentration of 128 µg/mL. <sup>b</sup> Percent haemolysis due to the corresponding peptide was calculated relative to Triton X-100 (taken as 100%). Exact data points were not provided therefore values were approximated from the graph provided.
